# Supplementary material for: Distinguishing Kawasaki Disease from Febrile Infectious Disease Using Gene Pair Signatures
Source: Biomed Res Int. 2020 Apr 26;2020:6539398. doi: 10.1155/2020/6539398 (PMC7201505; doi:10.1155/2020/6539398)
Supplement: Supplementary 2 — Table 1: the 2522 top scores gene pairs and the 60 top-ranked gene pairs. Supplementary Table 2: the performance of TRGP classifier in different GEO data sets. Supplementary Table 3: the importance of 12 gene pair signatures in the SVM classifier. Supplementary Table 4: the detailed information of each study of the discovery validation. [file 6539398.f2.zip]

Archive with 2 entries (2 files):
- Supplementary Materials-Table2-4_BMRI_3051554.docx
- Supplementary Table 1.The 2522 top scores gene pairs and the 60 top-ranked gene pairs.xlsx
