# Supplementary material for: Distinguishing Kawasaki Disease from Febrile Infectious Disease Using Gene Pair Signatures
Source: Biomed Res Int. 2020 Apr 26;2020:6539398. doi: 10.1155/2020/6539398 (PMC7201505; doi:10.1155/2020/6539398)
Supplement: Supplementary 2 — Table 1: the 2522 top scores gene pairs and the 60 top-ranked gene pairs. Supplementary Table 2: the performance of TRGP classifier in different GEO data sets. Supplementary Table 3: the importance of 12 gene pair signatures in the SVM classifier. Supplementary Table 4: the detailed information of each study of the discovery validation. [file 6539398.f2.zip › Supplementary Table 1.The 2522 top scores gene pairs and the 60 top-ranked gene pairs.xlsx]

## Sheet: Supplementary Table 1.The 2522 
Supplementary Table 1. The 2522 top scores gene pairs and the 60 top-ranked gene pairs
Gene pairs ID	Gene i EntrezID	Gene j EntrezID	Gene i Symbol	Gene j Symbol	Repetition rate	MeanScores	Top-ranked gene pairs
GenePair1	9778	9862	KIAA0232	MED24	0.6645	0.57225	Yes
GenePair2	9586	3429	CREB5	IFI27	0.5572	0.580179	Yes
GenePair3	10857	7384	PGRMC1	UQCRC1	0.4455	0.5193	Yes
GenePair4	7739	5096	ZNF185	PCCB	0.4241	0.570421	Yes
GenePair5	83999	8454	KREMEN1	CUL1	0.3973	0.555547	Yes
GenePair6	54602	116832	NDFIP2	RPL39L	0.3969	0.513456	Yes
GenePair7	64127	593	NOD2	BCKDHA	0.3827	0.504165	Yes
GenePair8	402483	5905	LINC01000	RANGAP1	0.374	0.570614	Yes
GenePair9	8843	55723	HCAR3	ASF1B	0.3353	0.50841	Yes
GenePair10	56034	79050	PDGFC	NOC4L	0.3066	0.569897	Yes
GenePair11	57533	474344	TBC1D14	GIMAP6	0.3026	0.549346	Yes
GenePair12	8870	950	IER3	SCARB2	0.2983	0.577098	Yes
GenePair13	22884	23077	WDR37	MYCBP2	0.2862	0.572378	Yes
GenePair14	83853	4938	ROPN1L	OAS1	0.2779	0.517848	Yes
GenePair15	1071	3959	CETP	LGALS3BP	0.2607	0.547627	Yes
GenePair16	3553	5315	IL1B	PKM	0.2512	0.505629	Yes
GenePair17	117289	4724	TAGAP	NDUFS4	0.2463	0.484763	Yes
GenePair18	11275	51284	KLHL2	TLR7	0.2437	0.531047	Yes
GenePair19	402483	4938	LINC01000	OAS1	0.24	0.555661	Yes
GenePair20	8530	4061	CST7	LY6E	0.2324	0.567904	Yes
GenePair21	9770	10589	RASSF2	DRAP1	0.2225	0.523951	Yes
GenePair22	5724	51056	PTAFR	LAP3	0.2215	0.539541	Yes
GenePair23	2537	3429	IFI6	IFI27	0.2141	0.579247	Yes
GenePair24	8436	81892	CAVIN2	SLIRP	0.2078	0.51511	Yes
GenePair25	84925	23165	DIRC2	NUP205	0.2036	0.510046	Yes
GenePair26	26502	55920	NARF	RCC2	0.1991	0.510865	Yes
GenePair27	8436	54460	CAVIN2	MRPS21	0.1973	0.521275	Yes
GenePair28	729359	9381	PLIN4	OTOF	0.1809	0.550048	Yes
GenePair29	51706	26284	CYB5R1	ERAL1	0.1804	0.49585	Yes
GenePair30	3553	1509	IL1B	CTSD	0.1799	0.521044	Yes
GenePair31	8848	3191	TSC22D1	HNRNPL	0.1753	0.477643	Yes
GenePair32	5165	286530	PDK3	P2RY8	0.1733	0.54696	Yes
GenePair33	9170	5315	LPAR2	PKM	0.1727	0.514569	Yes
GenePair34	55002	83743	TMCO3	GRWD1	0.1699	0.512157	Yes
GenePair35	8870	64761	IER3	PARP12	0.1641	0.542975	Yes
GenePair36	58191	9636	CXCL16	ISG15	0.1616	0.527213	Yes
GenePair37	23287	10921	AGTPBP1	RNPS1	0.1603	0.519442	Yes
GenePair38	6732	64761	SRPK1	PARP12	0.1552	0.535416	Yes
GenePair39	5724	64761	PTAFR	PARP12	0.1551	0.545169	Yes
GenePair40	83700	54867	JAM3	TMEM214	0.1541	0.589983	Yes
GenePair41	7059	55144	THBS3	LRRC8D	0.14	0.545781	Yes
GenePair42	3659	2023	IRF1	ENO1	0.1287	0.473225	Yes
GenePair43	84795	116832	PYROXD2	RPL39L	0.1265	0.556548	Yes
GenePair44	1602	955	DACH1	ENTPD6	0.123	0.49936	Yes
GenePair45	1071	152926	CETP	PPM1K	0.1225	0.538808	Yes
GenePair46	7273	79411	TTN	GLB1L	0.1213	0.530338	Yes
GenePair47	140885	4061	SIRPA	LY6E	0.1171	0.506588	Yes
GenePair48	3087	474344	HHEX	GIMAP6	0.1168	0.546824	Yes
GenePair49	5055	9381	SERPINB2	OTOF	0.114	0.533062	Yes
GenePair50	10135	4599	NAMPT	MX1	0.112	0.549289	Yes
GenePair51	132160	55748	PPM1M	CNDP2	0.1101	0.496125	Yes
GenePair52	1071	29078	CETP	NDUFAF4	0.1094	0.551574	Yes
GenePair53	9934	6522	P2RY14	SLC4A2	0.1091	0.510904	Yes
GenePair54	146225	994	CMTM2	CDC25B	0.1068	0.559608	Yes
GenePair55	55002	3728	TMCO3	JUP	0.1046	0.507667	Yes
GenePair56	5594	1786	MAPK1	DNMT1	0.1037	0.550963	Yes
GenePair57	146225	1786	CMTM2	DNMT1	0.1014	0.513066	Yes
GenePair58	26873	9797	OPLAH	TATDN2	0.1011	0.496524	Yes
GenePair59	1602	4939	DACH1	OAS2	0.1001	0.495552	Yes
GenePair60	402483	23077	LINC01000	MYCBP2	0.1001	0.573632	Yes
GenePair61	5724	55920	PTAFR	RCC2	0.0991	0.540234	No
GenePair62	5724	3429	PTAFR	IFI27	0.0976	0.583879	No
GenePair63	1602	79035	DACH1	NABP2	0.0972	0.527323	No
GenePair64	11275	3728	KLHL2	JUP	0.0961	0.544478	No
GenePair65	604	4599	BCL6	MX1	0.0942	0.533729	No
GenePair66	729359	3959	PLIN4	LGALS3BP	0.0942	0.589931	No
GenePair67	84925	8454	DIRC2	CUL1	0.0935	0.51066	No
GenePair68	84795	26608	PYROXD2	TBL2	0.092	0.490281	No
GenePair69	10079	26284	ATP9A	ERAL1	0.0917	0.51523	No
GenePair70	171586	4724	ABHD3	NDUFS4	0.0905	0.539223	No
GenePair71	51706	3587	CYB5R1	IL10RA	0.09	0.501847	No
GenePair72	9061	55920	PAPSS1	RCC2	0.0896	0.522741	No
GenePair73	59285	55937	CACNG6	APOM	0.0843	0.498044	No
GenePair74	3613	1786	IMPA2	DNMT1	0.0836	0.500552	No
GenePair75	56034	29015	PDGFC	SLC43A3	0.0834	0.605991	No
GenePair76	51380	3191	CSAD	HNRNPL	0.0829	0.539385	No
GenePair77	7752	4967	ZNF200	OGDH	0.081	0.48626	No
GenePair78	6249	23077	CLIP1	MYCBP2	0.0805	0.548954	No
GenePair79	10079	55615	ATP9A	PRR5	0.0797	0.499982	No
GenePair80	81027	476	TUBB1	ATP1A1	0.0794	0.481795	No
GenePair81	140885	4599	SIRPA	MX1	0.0777	0.490622	No
GenePair82	3556	9862	IL1RAP	MED24	0.0772	0.555935	No
GenePair83	64386	4061	MMP25	LY6E	0.0772	0.54749	No
GenePair84	9586	51056	CREB5	LAP3	0.0769	0.562026	No
GenePair85	400073	9797	C12orf76	TATDN2	0.0755	0.528264	No
GenePair86	3087	950	HHEX	SCARB2	0.0733	0.584423	No
GenePair87	51635	9377	DHRS7	COX5A	0.0729	0.528437	No
GenePair88	136	4939	ADORA2B	OAS2	0.0725	0.530451	No
GenePair89	83700	9641	JAM3	IKBKE	0.0721	0.63844	No
GenePair90	9519	51329	TBPL1	ARL6IP4	0.071	0.503511	No
GenePair91	120425	4061	JAML	LY6E	0.0707	0.545055	No
GenePair92	57136	1870	APMAP	E2F2	0.0706	0.596726	No
GenePair93	9586	4502	CREB5	MT2A	0.069	0.525556	No
GenePair94	5423	81892	POLB	SLIRP	0.0689	0.479085	No
GenePair95	11275	4493	KLHL2	MT1E	0.0686	0.52882	No
GenePair96	10205	55723	MPZL2	ASF1B	0.0678	0.487994	No
GenePair97	136	9381	ADORA2B	OTOF	0.0644	0.517711	No
GenePair98	51380	81892	CSAD	SLIRP	0.0643	0.534076	No
GenePair99	55002	51493	TMCO3	RTCB	0.0639	0.507042	No
GenePair100	84795	79228	PYROXD2	THOC6	0.0633	0.567739	No
GenePair101	23287	4521	AGTPBP1	NUDT1	0.0631	0.538381	No
GenePair102	83700	56919	JAM3	DHX33	0.0622	0.599327	No
GenePair103	3613	3128	IMPA2	HLA-DRB6	0.0614	0.513183	No
GenePair104	7739	23077	ZNF185	MYCBP2	0.0605	0.620501	No
GenePair105	79623	23034	GALNT14	SAMD4A	0.0602	0.526634	No
GenePair106	7273	55219	TTN	MACO1	0.0589	0.512472	No
GenePair107	22884	5096	WDR37	PCCB	0.0581	0.553899	No
GenePair108	220042	51284	DDIAS	TLR7	0.058	0.492493	No
GenePair109	8870	474344	IER3	GIMAP6	0.0572	0.533649	No
GenePair110	3613	1870	IMPA2	E2F2	0.057	0.588072	No
GenePair111	9934	131076	P2RY14	CCDC58	0.0543	0.496346	No
GenePair112	9061	286530	PAPSS1	P2RY8	0.0541	0.547823	No
GenePair113	6652	54460	SORD	MRPS21	0.054	0.480974	No
GenePair114	22884	2618	WDR37	GART	0.0538	0.538505	No
GenePair115	57533	10921	TBC1D14	RNPS1	0.0538	0.541093	No
GenePair116	220213	3728	OTUD1	JUP	0.0533	0.578948	No
GenePair117	5724	27338	PTAFR	UBE2S	0.0531	0.566166	No
GenePair118	9778	152926	KIAA0232	PPM1K	0.0523	0.549482	No
GenePair119	11275	51493	KLHL2	RTCB	0.052	0.56465	No
GenePair120	9218	152926	VAPA	PPM1K	0.0518	0.540034	No
GenePair121	81027	539	TUBB1	ATP5PO	0.0513	0.470462	No
GenePair122	5836	4599	PYGL	MX1	0.0504	0.501761	No
GenePair123	146225	5610	CMTM2	EIF2AK2	0.0498	0.508657	No
GenePair124	55002	9797	TMCO3	TATDN2	0.0495	0.53253	No
GenePair125	83999	55337	KREMEN1	C19orf66	0.0495	0.544683	No
GenePair126	55002	9688	TMCO3	NUP93	0.0494	0.516722	No
GenePair127	9586	2537	CREB5	IFI6	0.0493	0.542296	No
GenePair128	402483	3587	LINC01000	IL10RA	0.0491	0.559577	No
GenePair129	3104	23165	ZBTB48	NUP205	0.0489	0.560327	No
GenePair130	84519	93974	ACRBP	ATP5IF1	0.0489	0.474712	No
GenePair131	83999	23165	KREMEN1	NUP205	0.0488	0.557695	No
GenePair132	101	7384	ADAM8	UQCRC1	0.0487	0.541526	No
GenePair133	84925	5096	DIRC2	PCCB	0.0485	0.528366	No
GenePair134	3556	3959	IL1RAP	LGALS3BP	0.0482	0.558203	No
GenePair135	1071	79714	CETP	CCDC51	0.0452	0.568977	No
GenePair136	1602	162394	DACH1	SLFN5	0.045	0.522159	No
GenePair137	5423	93974	POLB	ATP5IF1	0.0447	0.471043	No
GenePair138	220042	79035	DDIAS	NABP2	0.044	0.53357	No
GenePair139	57561	84320	ARRDC3	ACBD6	0.044	0.481321	No
GenePair140	10079	4839	ATP9A	NOP2	0.0439	0.500826	No
GenePair141	26502	9636	NARF	ISG15	0.0435	0.489398	No
GenePair142	56034	9381	PDGFC	OTOF	0.0432	0.508459	No
GenePair143	83700	55723	JAM3	ASF1B	0.0432	0.585383	No
GenePair144	101	5315	ADAM8	PKM	0.0424	0.505555	No
GenePair145	58191	64761	CXCL16	PARP12	0.0422	0.532678	No
GenePair146	1071	139341	CETP	FUNDC1	0.042	0.572397	No
GenePair147	54602	11260	NDFIP2	XPOT	0.0418	0.564169	No
GenePair148	9934	51098	P2RY14	IFT52	0.0413	0.501991	No
GenePair149	58191	51056	CXCL16	LAP3	0.0411	0.539472	No
GenePair150	79663	8454	HSPBAP1	CUL1	0.0408	0.500593	No
GenePair151	3556	4939	IL1RAP	OAS2	0.0399	0.513229	No
GenePair152	8870	286530	IER3	P2RY8	0.0398	0.508175	No
GenePair153	7273	131076	TTN	CCDC58	0.0396	0.501106	No
GenePair154	83999	6520	KREMEN1	SLC3A2	0.0395	0.547781	No
GenePair155	9489	9636	PGS1	ISG15	0.0395	0.493247	No
GenePair156	7292	9967	TNFSF4	THRAP3	0.0393	0.482781	No
GenePair157	9588	476	PRDX6	ATP1A1	0.0393	0.524955	No
GenePair158	2634	2023	GBP2	ENO1	0.0392	0.473821	No
GenePair159	56034	29993	PDGFC	PACSIN1	0.0389	0.477547	No
GenePair160	6249	2618	CLIP1	GART	0.0375	0.510345	No
GenePair161	79623	9381	GALNT14	OTOF	0.0375	0.515398	No
GenePair162	9934	79411	P2RY14	GLB1L	0.0375	0.516274	No
GenePair163	58500	7841	ZNF250	MOGS	0.0374	0.479942	No
GenePair164	79188	5695	TMEM43	PSMB7	0.0374	0.491618	No
GenePair165	10908	51056	PNPLA6	LAP3	0.0366	0.512756	No
GenePair166	6432	4724	SRSF7	NDUFS4	0.0366	0.4908	No
GenePair167	9094	3587	UNC119	IL10RA	0.0364	0.537909	No
GenePair168	29035	474344	C16orf72	GIMAP6	0.0362	0.5302	No
GenePair169	140885	2014	SIRPA	EMP3	0.0356	0.559783	No
GenePair170	2273	55723	FHL1	ASF1B	0.0354	0.537967	No
GenePair171	2150	9332	F2RL1	CD163	0.0349	0.575109	No
GenePair172	56034	23328	PDGFC	SASH1	0.0348	0.480965	No
GenePair173	79663	3728	HSPBAP1	JUP	0.0347	0.502631	No
GenePair174	51706	5096	CYB5R1	PCCB	0.0346	0.503566	No
GenePair175	1071	10392	CETP	NOD1	0.0343	0.546909	No
GenePair176	51380	11335	CSAD	CBX3	0.0339	0.536819	No
GenePair177	8843	5510	HCAR3	PPP1R7	0.0329	0.494457	No
GenePair178	10205	4864	MPZL2	NPC1	0.0322	0.490938	No
GenePair179	9061	51056	PAPSS1	LAP3	0.0321	0.505625	No
GenePair180	5423	54460	POLB	MRPS21	0.0319	0.480764	No
GenePair181	7273	55937	TTN	APOM	0.0317	0.487829	No
GenePair182	284129	9381	SLC26A11	OTOF	0.0313	0.492644	No
GenePair183	7273	6164	TTN	RPL34	0.0313	0.506562	No
GenePair184	5055	3959	SERPINB2	LGALS3BP	0.0311	0.533803	No
GenePair185	5874	54165	RAB27B	DCUN1D1	0.0309	0.550819	No
GenePair186	84925	55337	DIRC2	C19orf66	0.0302	0.510479	No
GenePair187	59285	23093	CACNG6	TTLL5	0.0301	0.492122	No
GenePair188	9934	55219	P2RY14	MACO1	0.03	0.521937	No
GenePair189	146225	9636	CMTM2	ISG15	0.0296	0.508317	No
GenePair190	23483	10671	TGDS	DCTN6	0.0295	0.507594	No
GenePair191	57532	81892	NUFIP2	SLIRP	0.0294	0.475117	No
GenePair192	9770	55748	RASSF2	CNDP2	0.0293	0.483899	No
GenePair193	3104	593	ZBTB48	BCKDHA	0.0292	0.616304	No
GenePair194	9520	4501	NPEPPS	MT1X	0.0292	0.520998	No
GenePair195	9934	23093	P2RY14	TTLL5	0.0289	0.49141	No
GenePair196	23287	6240	AGTPBP1	RRM1	0.0288	0.561864	No
GenePair197	117289	9797	TAGAP	TATDN2	0.0287	0.492025	No
GenePair198	57136	55920	APMAP	RCC2	0.0285	0.508999	No
GenePair199	8436	51023	CAVIN2	MRPS18C	0.0281	0.521419	No
GenePair200	8870	10561	IER3	IFI44	0.0273	0.493883	No
GenePair201	56034	4495	PDGFC	MT1G	0.0272	0.521465	No
GenePair202	83999	6741	KREMEN1	SSB	0.0272	0.548088	No
GenePair203	79623	3959	GALNT14	LGALS3BP	0.0271	0.550699	No
GenePair204	83853	3587	ROPN1L	IL10RA	0.0271	0.528955	No
GenePair205	83999	3728	KREMEN1	JUP	0.027	0.543968	No
GenePair206	10079	91543	ATP9A	RSAD2	0.0268	0.47842	No
GenePair207	84795	133957	PYROXD2	CCDC127	0.0261	0.520678	No
GenePair208	1602	7347	DACH1	UCHL3	0.0259	0.544514	No
GenePair209	51380	113802	CSAD	HENMT1	0.0259	0.50232	No
GenePair210	55276	3728	PGM2	JUP	0.0259	0.526602	No
GenePair211	9934	5875	P2RY14	RABGGTA	0.0258	0.525987	No
GenePair212	9061	27338	PAPSS1	UBE2S	0.0257	0.572995	No
GenePair213	2982	117246	GUCY1A1	FTSJ3	0.0252	0.475867	No
GenePair214	2150	55723	F2RL1	ASF1B	0.0245	0.553066	No
GenePair215	133	2023	ADM	ENO1	0.0244	0.491567	No
GenePair216	9934	83734	P2RY14	ATG10	0.0243	0.495394	No
GenePair217	1071	9381	CETP	OTOF	0.0241	0.522169	No
GenePair218	55002	6520	TMCO3	SLC3A2	0.0241	0.514488	No
GenePair219	9489	5610	PGS1	EIF2AK2	0.0237	0.539519	No
GenePair220	1602	79443	DACH1	FYCO1	0.0236	0.516856	No
GenePair221	3553	7384	IL1B	UQCRC1	0.0235	0.49269	No
GenePair222	7273	284656	TTN	EPHA10	0.0228	0.483322	No
GenePair223	9778	4939	KIAA0232	OAS2	0.0225	0.517389	No
GenePair224	1602	14	DACH1	AAMP	0.0223	0.533171	No
GenePair225	10205	10671	MPZL2	DCTN6	0.0222	0.485206	No
GenePair226	24146	9797	CLDN15	TATDN2	0.0222	0.558324	No
GenePair227	7273	79228	TTN	THOC6	0.0222	0.525812	No
GenePair228	3687	9636	ITGAX	ISG15	0.0221	0.515688	No
GenePair229	51380	93974	CSAD	ATP5IF1	0.0221	0.541574	No
GenePair230	3556	152926	IL1RAP	PPM1K	0.022	0.542284	No
GenePair231	359845	55149	RFLNB	MTPAP	0.022	0.49506	No
GenePair232	146223	23328	CMTM4	SASH1	0.0219	0.504728	No
GenePair233	57532	10007	NUFIP2	GNPDA1	0.0219	0.517665	No
GenePair234	400073	1025	C12orf76	CDK9	0.0216	0.470294	No
GenePair235	6500	404672	SKP1	GTF2H5	0.0214	0.502845	No
GenePair236	284129	29078	SLC26A11	NDUFAF4	0.0213	0.50991	No
GenePair237	83700	83986	JAM3	FAM234A	0.0211	0.576769	No
GenePair238	11275	8454	KLHL2	CUL1	0.0208	0.558802	No
GenePair239	11330	4939	CTRC	OAS2	0.0207	0.514023	No
GenePair240	58191	10964	CXCL16	IFI44L	0.0207	0.508227	No
GenePair241	80325	10589	ABTB1	DRAP1	0.0204	0.535973	No
GenePair242	171586	54165	ABHD3	DCUN1D1	0.0203	0.578128	No
GenePair243	4638	79411	MYLK	GLB1L	0.0203	0.50902	No
GenePair244	7273	7841	TTN	MOGS	0.0201	0.492293	No
GenePair245	11330	9381	CTRC	OTOF	0.02	0.509426	No
GenePair246	55002	55149	TMCO3	MTPAP	0.0198	0.507002	No
GenePair247	7752	54165	ZNF200	DCUN1D1	0.0198	0.512783	No
GenePair248	7752	23392	ZNF200	ECPAS	0.0197	0.493171	No
GenePair249	9094	5905	UNC119	RANGAP1	0.0197	0.54276	No
GenePair250	79663	6741	HSPBAP1	SSB	0.0196	0.521185	No
GenePair251	84925	26284	DIRC2	ERAL1	0.0196	0.528702	No
GenePair252	26873	4493	OPLAH	MT1E	0.0193	0.484707	No
GenePair253	8870	3434	IER3	IFIT1	0.0193	0.480503	No
GenePair254	83700	84987	JAM3	COX14	0.0192	0.60536	No
GenePair255	146225	3128	CMTM2	HLA-DRB6	0.0191	0.512441	No
GenePair256	56034	3959	PDGFC	LGALS3BP	0.0189	0.542989	No
GenePair257	26873	6520	OPLAH	SLC3A2	0.0188	0.505226	No
GenePair258	1602	55144	DACH1	LRRC8D	0.0187	0.503447	No
GenePair259	220042	26010	DDIAS	SPATS2L	0.0186	0.489465	No
GenePair260	56034	129607	PDGFC	CMPK2	0.0185	0.481283	No
GenePair261	83853	91543	ROPN1L	RSAD2	0.0185	0.4863	No
GenePair262	84795	51668	PYROXD2	HSPB11	0.0183	0.555625	No
GenePair263	23287	64761	AGTPBP1	PARP12	0.0182	0.490703	No
GenePair264	64386	4599	MMP25	MX1	0.0181	0.518382	No
GenePair265	220042	79132	DDIAS	DHX58	0.0179	0.506256	No
GenePair266	5594	1870	MAPK1	E2F2	0.0179	0.638813	No
GenePair267	9770	4061	RASSF2	LY6E	0.0177	0.531851	No
GenePair268	84255	9381	SLC37A3	OTOF	0.0175	0.507934	No
GenePair269	9061	4691	PAPSS1	NCL	0.0175	0.54924	No
GenePair270	83700	6720	JAM3	SREBF1	0.0174	0.611998	No
GenePair271	10284	9641	SAP18	IKBKE	0.0172	0.499965	No
GenePair272	165140	3959	OXER1	LGALS3BP	0.0171	0.561884	No
GenePair273	83700	4864	JAM3	NPC1	0.0171	0.563548	No
GenePair274	83999	26010	KREMEN1	SPATS2L	0.0171	0.500906	No
GenePair275	9934	2022	P2RY14	ENG	0.0168	0.537006	No
GenePair276	54739	3429	XAF1	IFI27	0.0167	0.58305	No
GenePair277	604	4061	BCL6	LY6E	0.0167	0.527608	No
GenePair278	9489	10964	PGS1	IFI44L	0.0167	0.486785	No
GenePair279	9934	6164	P2RY14	RPL34	0.0167	0.525061	No
GenePair280	51062	26608	ATL1	TBL2	0.0166	0.501978	No
GenePair281	51706	57062	CYB5R1	DDX24	0.0165	0.486957	No
GenePair282	83999	51284	KREMEN1	TLR7	0.0165	0.510205	No
GenePair283	359845	285367	RFLNB	RPUSD3	0.0164	0.502188	No
GenePair284	84925	64928	DIRC2	MRPL14	0.0163	0.512308	No
GenePair285	9519	81892	TBPL1	SLIRP	0.0163	0.48597	No
GenePair286	3556	9381	IL1RAP	OTOF	0.0161	0.503872	No
GenePair287	7378	55748	UPP1	CNDP2	0.016	0.493106	No
GenePair288	29035	51056	C16orf72	LAP3	0.0159	0.512317	No
GenePair289	9520	10921	NPEPPS	RNPS1	0.0159	0.518705	No
GenePair290	9934	133957	P2RY14	CCDC127	0.0159	0.51045	No
GenePair291	3556	955	IL1RAP	ENTPD6	0.0155	0.536871	No
GenePair292	5055	4939	SERPINB2	OAS2	0.0155	0.53011	No
GenePair293	5610	3429	EIF2AK2	IFI27	0.0151	0.573346	No
GenePair294	8843	9641	HCAR3	IKBKE	0.0151	0.495808	No
GenePair295	9519	51023	TBPL1	MRPS18C	0.015	0.477885	No
GenePair296	2150	54867	F2RL1	TMEM214	0.0148	0.567532	No
GenePair297	2150	4864	F2RL1	NPC1	0.0146	0.5447	No
GenePair298	8675	476	STX16	ATP1A1	0.0146	0.490833	No
GenePair299	9778	29078	KIAA0232	NDUFAF4	0.0146	0.555327	No
GenePair300	55002	285367	TMCO3	RPUSD3	0.0145	0.516418	No
GenePair301	83700	10671	JAM3	DCTN6	0.0145	0.546098	No
GenePair302	51635	4061	DHRS7	LY6E	0.0142	0.536033	No
GenePair303	58500	79228	ZNF250	THOC6	0.0142	0.562609	No
GenePair304	9934	2187	P2RY14	FANCB	0.0141	0.497483	No
GenePair305	10079	2618	ATP9A	GART	0.014	0.493263	No
GenePair306	11275	91543	KLHL2	RSAD2	0.014	0.48583	No
GenePair307	3613	4502	IMPA2	MT2A	0.014	0.498494	No
GenePair308	6249	204	CLIP1	AK2	0.0139	0.488305	No
GenePair309	9647	55748	PPM1F	CNDP2	0.0138	0.502369	No
GenePair310	22884	4704	WDR37	NDUFA9	0.0137	0.584641	No
GenePair311	10079	5905	ATP9A	RANGAP1	0.0136	0.507353	No
GenePair312	5836	55748	PYGL	CNDP2	0.0135	0.494392	No
GenePair313	359845	83743	RFLNB	GRWD1	0.0133	0.488261	No
GenePair314	79663	285367	HSPBAP1	RPUSD3	0.0132	0.524746	No
GenePair315	79663	4682	HSPBAP1	NUBP1	0.0132	0.507341	No
GenePair316	10079	2067	ATP9A	ERCC1	0.0131	0.525427	No
GenePair317	6500	3191	SKP1	HNRNPL	0.0131	0.489233	No
GenePair318	9934	10124	P2RY14	ARL4A	0.0131	0.501852	No
GenePair319	2992	4061	GYG1	LY6E	0.013	0.540373	No
GenePair320	60675	6275	PROK2	S100A4	0.0127	0.5009	No
GenePair321	84669	51284	USP32	TLR7	0.0127	0.521141	No
GenePair322	3087	64761	HHEX	PARP12	0.0126	0.56363	No
GenePair323	400073	1606	C12orf76	DGKA	0.0124	0.486344	No
GenePair324	83700	7515	JAM3	XRCC1	0.0124	0.614534	No
GenePair325	249	4061	ALPL	LY6E	0.0123	0.519962	No
GenePair326	133	4061	ADM	LY6E	0.0122	0.587218	No
GenePair327	146225	1870	CMTM2	E2F2	0.0122	0.557252	No
GenePair328	9934	284656	P2RY14	EPHA10	0.0122	0.479143	No
GenePair329	8555	7841	CDC14B	MOGS	0.0121	0.483328	No
GenePair330	51706	204	CYB5R1	AK2	0.012	0.483572	No
GenePair331	146225	8175	CMTM2	SF3A2	0.0119	0.511025	No
GenePair332	5874	27258	RAB27B	LSM3	0.0119	0.488192	No
GenePair333	79623	6355	GALNT14	CCL8	0.0118	0.477719	No
GenePair334	146225	55707	CMTM2	NECAP2	0.0117	0.565988	No
GenePair335	9519	404672	TBPL1	GTF2H5	0.0117	0.488026	No
GenePair336	58497	1025	PRUNE1	CDK9	0.0116	0.482249	No
GenePair337	83853	6730	ROPN1L	SRP68	0.0116	0.542583	No
GenePair338	9934	7841	P2RY14	MOGS	0.0116	0.477414	No
GenePair339	24146	54165	CLDN15	DCUN1D1	0.0114	0.50905	No
GenePair340	7273	23093	TTN	TTLL5	0.0114	0.503099	No
GenePair341	84925	7965	DIRC2	AIMP2	0.0114	0.508988	No
GenePair342	24146	55761	CLDN15	TTC17	0.0113	0.490967	No
GenePair343	3693	4967	ITGB5	OGDH	0.0113	0.490946	No
GenePair344	3772	3191	KCNJ15	HNRNPL	0.0112	0.552425	No
GenePair345	1071	26090	CETP	ABHD12	0.0111	0.550634	No
GenePair346	26502	1870	NARF	E2F2	0.0111	0.628674	No
GenePair347	10079	7965	ATP9A	AIMP2	0.011	0.496478	No
GenePair348	9605	4938	VPS9D1	OAS1	0.0109	0.532128	No
GenePair349	8843	53	HCAR3	ACP2	0.0107	0.533807	No
GenePair350	402483	55337	LINC01000	C19orf66	0.0106	0.567932	No
GenePair351	84669	4493	USP32	MT1E	0.0105	0.522236	No
GenePair352	272	9381	AMPD3	OTOF	0.0103	0.512109	No
GenePair353	7048	9377	TGFBR2	COX5A	0.0103	0.577619	No
GenePair354	29035	10561	C16orf72	IFI44	0.0102	0.489522	No
GenePair355	5154	26608	PDGFA	TBL2	0.0102	0.521121	No
GenePair356	83999	130589	KREMEN1	GALM	0.0102	0.571114	No
GenePair357	30061	51056	SLC40A1	LAP3	0.0101	0.550907	No
GenePair358	5836	3669	PYGL	ISG20	0.0101	0.474159	No
GenePair359	7048	4061	TGFBR2	LY6E	0.0101	0.540466	No
GenePair360	146225	286530	CMTM2	P2RY8	0.01	0.490919	No
GenePair361	64127	81892	NOD2	SLIRP	0.01	0.487463	No
GenePair362	84795	55219	PYROXD2	MACO1	0.0099	0.502234	No
GenePair363	6500	10007	SKP1	GNPDA1	0.0098	0.558271	No
GenePair364	199675	4599	MCEMP1	MX1	0.0097	0.506323	No
GenePair365	56034	4939	PDGFC	OAS2	0.0096	0.509408	No
GenePair366	7059	116028	THBS3	RMI2	0.0096	0.593377	No
GenePair367	2982	56919	GUCY1A1	DHX33	0.0095	0.481645	No
GenePair368	56034	9603	PDGFC	NFE2L3	0.0094	0.52971	No
GenePair369	7059	79443	THBS3	FYCO1	0.0094	0.525817	No
GenePair370	7059	955	THBS3	ENTPD6	0.0094	0.499081	No
GenePair371	7273	7443	TTN	VRK1	0.0094	0.504077	No
GenePair372	83862	51056	TMEM120A	LAP3	0.0094	0.509924	No
GenePair373	8843	9332	HCAR3	CD163	0.0094	0.520061	No
GenePair374	2982	55723	GUCY1A1	ASF1B	0.0093	0.480734	No
GenePair375	8436	113802	CAVIN2	HENMT1	0.009	0.468863	No
GenePair376	84669	6520	USP32	SLC3A2	0.009	0.567024	No
GenePair377	9934	23500	P2RY14	DAAM2	0.009	0.456664	No
GenePair378	5724	286530	PTAFR	P2RY8	0.0087	0.519357	No
GenePair379	9061	64761	PAPSS1	PARP12	0.0087	0.51726	No
GenePair380	5874	9641	RAB27B	IKBKE	0.0086	0.498661	No
GenePair381	23531	10007	MMD	GNPDA1	0.0085	0.468461	No
GenePair382	285362	51493	SUMF1	RTCB	0.0085	0.497614	No
GenePair383	5142	1108	PDE4B	CHD4	0.0085	0.508228	No
GenePair384	7059	10915	THBS3	TCERG1	0.0085	0.573398	No
GenePair385	84925	23077	DIRC2	MYCBP2	0.0085	0.514916	No
GenePair386	1602	139341	DACH1	FUNDC1	0.0084	0.520947	No
GenePair387	23483	9031	TGDS	BAZ1B	0.0084	0.468396	No
GenePair388	55002	4493	TMCO3	MT1E	0.0084	0.510435	No
GenePair389	58500	6522	ZNF250	SLC4A2	0.0084	0.489049	No
GenePair390	79663	55337	HSPBAP1	C19orf66	0.0084	0.496683	No
GenePair391	11330	87178	CTRC	PNPT1	0.0083	0.526773	No
GenePair392	80325	55748	ABTB1	CNDP2	0.0083	0.495894	No
GenePair393	9586	9636	CREB5	ISG15	0.0083	0.510899	No
GenePair394	79663	51172	HSPBAP1	NAGPA	0.0082	0.529474	No
GenePair395	8972	4938	MGAM	OAS1	0.0082	0.52826	No
GenePair396	23483	54617	TGDS	INO80	0.0081	0.49741	No
GenePair397	284129	26090	SLC26A11	ABHD12	0.0081	0.497018	No
GenePair398	57561	10124	ARRDC3	ARL4A	0.0081	0.503652	No
GenePair399	58500	29015	ZNF250	SLC43A3	0.008	0.588849	No
GenePair400	1071	4939	CETP	OAS2	0.0078	0.531055	No
GenePair401	146225	22827	CMTM2	PUF60	0.0078	0.53528	No
GenePair402	9520	204	NPEPPS	AK2	0.0078	0.477145	No
GenePair403	7273	64857	TTN	PLEKHG2	0.0077	0.464506	No
GenePair404	9094	4501	UNC119	MT1X	0.0077	0.575399	No
GenePair405	9778	9381	KIAA0232	OTOF	0.0077	0.508016	No
GenePair406	51706	23077	CYB5R1	MYCBP2	0.0076	0.514988	No
GenePair407	58500	133957	ZNF250	CCDC127	0.0076	0.490801	No
GenePair408	8843	54867	HCAR3	TMEM214	0.0076	0.471694	No
GenePair409	1232	9641	CCR3	IKBKE	0.0075	0.497386	No
GenePair410	654	2519	BMP6	FUCA2	0.0075	0.492053	No
GenePair411	5836	9377	PYGL	COX5A	0.0074	0.500921	No
GenePair412	7059	152926	THBS3	PPM1K	0.0074	0.476039	No
GenePair413	7059	26010	THBS3	SPATS2L	0.0073	0.48722	No
GenePair414	7739	593	ZNF185	BCKDHA	0.0073	0.663797	No
GenePair415	837	476	CASP4	ATP1A1	0.0073	0.468432	No
GenePair416	10857	2617	PGRMC1	GARS	0.0072	0.536363	No
GenePair417	1232	10671	CCR3	DCTN6	0.0072	0.463694	No
GenePair418	131583	9552	FAM43A	SPAG7	0.0072	0.466688	No
GenePair419	57532	54985	NUFIP2	HCFC1R1	0.0072	0.46885	No
GenePair420	84925	6730	DIRC2	SRP68	0.0072	0.520793	No
GenePair421	3104	4839	ZBTB48	NOP2	0.0071	0.596492	No
GenePair422	83700	27258	JAM3	LSM3	0.0071	0.509458	No
GenePair423	8843	4437	HCAR3	MSH3	0.0071	0.484384	No
GenePair424	120425	10589	JAML	DRAP1	0.007	0.534303	No
GenePair425	2150	124936	F2RL1	CYB5D2	0.007	0.504933	No
GenePair426	23299	286530	BICD2	P2RY8	0.007	0.527565	No
GenePair427	4638	5875	MYLK	RABGGTA	0.007	0.524802	No
GenePair428	8654	55723	PDE5A	ASF1B	0.007	0.517881	No
GenePair429	23483	4864	TGDS	NPC1	0.0069	0.470827	No
GenePair430	4851	7384	NOTCH1	UQCRC1	0.0069	0.577252	No
GenePair431	57533	1211	TBC1D14	CLTA	0.0069	0.585709	No
GenePair432	59285	51098	CACNG6	IFT52	0.0069	0.475563	No
GenePair433	83853	4501	ROPN1L	MT1X	0.0069	0.523914	No
GenePair434	9586	10964	CREB5	IFI44L	0.0069	0.494672	No
GenePair435	84925	9797	DIRC2	TATDN2	0.0068	0.514108	No
GenePair436	10126	9343	DNAL4	EFTUD2	0.0067	0.528481	No
GenePair437	1071	9603	CETP	NFE2L3	0.0067	0.538295	No
GenePair438	22884	204	WDR37	AK2	0.0067	0.511437	No
GenePair439	5055	23034	SERPINB2	SAMD4A	0.0067	0.516679	No
GenePair440	79663	51493	HSPBAP1	RTCB	0.0067	0.494045	No
GenePair441	1602	51493	DACH1	RTCB	0.0066	0.538219	No
GenePair442	3772	1108	KCNJ15	CHD4	0.0065	0.547989	No
GenePair443	7273	91775	TTN	NXPE3	0.0065	0.472362	No
GenePair444	7739	55337	ZNF185	C19orf66	0.0064	0.505396	No
GenePair445	23483	54867	TGDS	TMEM214	0.0063	0.463385	No
GenePair446	3556	29078	IL1RAP	NDUFAF4	0.0063	0.536498	No
GenePair447	57533	5905	TBC1D14	RANGAP1	0.0063	0.525246	No
GenePair448	58497	5910	PRUNE1	RAP1GDS1	0.0063	0.529229	No
GenePair449	58500	51002	ZNF250	TPRKB	0.0063	0.518842	No
GenePair450	79663	23338	HSPBAP1	JADE2	0.0063	0.510361	No
GenePair451	79887	55303	PLBD1	GIMAP4	0.0063	0.487667	No
GenePair452	84255	4939	SLC37A3	OAS2	0.0063	0.509623	No
GenePair453	9520	9410	NPEPPS	SNRNP40	0.0063	0.524194	No
GenePair454	11275	6520	KLHL2	SLC3A2	0.0062	0.558766	No
GenePair455	29767	81790	TMOD2	RNF170	0.0062	0.484991	No
GenePair456	10857	126328	PGRMC1	NDUFA11	0.0061	0.502418	No
GenePair457	54602	55723	NDFIP2	ASF1B	0.0061	0.531433	No
GenePair458	7273	58500	TTN	ZNF250	0.0061	0.46721	No
GenePair459	83700	387893	JAM3	KMT5A	0.0061	0.523842	No
GenePair460	8972	26284	MGAM	ERAL1	0.0061	0.546716	No
GenePair461	220042	4493	DDIAS	MT1E	0.006	0.544153	No
GenePair462	55276	6520	PGM2	SLC3A2	0.006	0.525383	No
GenePair463	56996	9636	SLC12A9	ISG15	0.006	0.503182	No
GenePair464	79623	129607	GALNT14	CMPK2	0.006	0.483214	No
GenePair465	9934	51002	P2RY14	TPRKB	0.006	0.515776	No
GenePair466	24146	1025	CLDN15	CDK9	0.0059	0.473219	No
GenePair467	51380	593	CSAD	BCKDHA	0.0059	0.555028	No
GenePair468	8968	4967	HIST1H3F	OGDH	0.0059	0.515266	No
GenePair469	79188	522	TMEM43	ATP5PF	0.0058	0.482078	No
GenePair470	1071	23386	CETP	NUDCD3	0.0057	0.563761	No
GenePair471	51439	4724	FAM8A1	NDUFS4	0.0057	0.49477	No
GenePair472	7048	3429	TGFBR2	IFI27	0.0057	0.553093	No
GenePair473	134957	955	STXBP5	ENTPD6	0.0056	0.476687	No
GenePair474	146225	54739	CMTM2	XAF1	0.0056	0.495028	No
GenePair475	23258	476	DENND5A	ATP1A1	0.0056	0.51371	No
GenePair476	3669	4061	ISG20	LY6E	0.0056	0.500321	No
GenePair477	220042	116028	DDIAS	RMI2	0.0055	0.543375	No
GenePair478	400073	4240	C12orf76	MFGE8	0.0055	0.494554	No
GenePair479	10284	53	SAP18	ACP2	0.0054	0.511016	No
GenePair480	220042	7347	DDIAS	UCHL3	0.0054	0.551787	No
GenePair481	3556	26010	IL1RAP	SPATS2L	0.0054	0.510882	No
GenePair482	4638	7841	MYLK	MOGS	0.0054	0.475796	No
GenePair483	64386	3669	MMP25	ISG20	0.0054	0.507703	No
GenePair484	7273	5875	TTN	RABGGTA	0.0054	0.530544	No
GenePair485	7273	65260	TTN	COA7	0.0054	0.50514	No
GenePair486	79887	3429	PLBD1	IFI27	0.0054	0.541972	No
GenePair487	220042	10384	DDIAS	BTN3A3	0.0053	0.489875	No
GenePair488	3087	4938	HHEX	OAS1	0.0053	0.487948	No
GenePair489	5055	4495	SERPINB2	MT1G	0.0053	0.521002	No
GenePair490	23483	2171	TGDS	FABP5	0.0052	0.527652	No
GenePair491	56034	2146	PDGFC	EZH2	0.0052	0.532513	No
GenePair492	58191	3128	CXCL16	HLA-DRB6	0.0052	0.507183	No
GenePair493	84795	488	PYROXD2	ATP2A2	0.0052	0.486006	No
GenePair494	29767	50	TMOD2	ACO2	0.0051	0.474535	No
GenePair495	8972	55337	MGAM	C19orf66	0.0051	0.549124	No
GenePair496	400073	10084	C12orf76	PQBP1	0.005	0.467415	No
GenePair497	55276	51493	PGM2	RTCB	0.005	0.51565	No
GenePair498	286006	4939	LSMEM1	OAS2	0.0049	0.545574	No
GenePair499	29035	27338	C16orf72	UBE2S	0.0049	0.576536	No
GenePair500	2982	4864	GUCY1A1	NPC1	0.0049	0.480129	No
GenePair501	84925	1635	DIRC2	DCTD	0.0049	0.514691	No
GenePair502	9170	1345	LPAR2	COX6C	0.0049	0.502404	No
GenePair503	163351	79411	GBP6	GLB1L	0.0048	0.484509	No
GenePair504	285362	9688	SUMF1	NUP93	0.0048	0.516767	No
GenePair505	3104	26284	ZBTB48	ERAL1	0.0048	0.576491	No
GenePair506	3553	522	IL1B	ATP5PF	0.0048	0.504481	No
GenePair507	3556	10392	IL1RAP	NOD1	0.0048	0.550794	No
GenePair508	3566	1786	IL4R	DNMT1	0.0048	0.547724	No
GenePair509	51062	10124	ATL1	ARL4A	0.0048	0.513567	No
GenePair510	51062	488	ATL1	ATP2A2	0.0048	0.515978	No
GenePair511	54602	79228	NDFIP2	THOC6	0.0048	0.479759	No
GenePair512	58500	55219	ZNF250	MACO1	0.0048	0.5315	No
GenePair513	6652	10007	SORD	GNPDA1	0.0048	0.524127	No
GenePair514	8972	8454	MGAM	CUL1	0.0048	0.53356	No
GenePair515	7739	26284	ZNF185	ERAL1	0.0047	0.583312	No
GenePair516	83700	9332	JAM3	CD163	0.0046	0.54101	No
GenePair517	83862	23636	TMEM120A	NUP62	0.0046	0.518516	No
GenePair518	9586	10561	CREB5	IFI44	0.0046	0.494154	No
GenePair519	163351	51098	GBP6	IFT52	0.0045	0.465629	No
GenePair520	7940	55748	LST1	CNDP2	0.0045	0.48588	No
GenePair521	83853	4839	ROPN1L	NOP2	0.0045	0.53444	No
GenePair522	83999	9797	KREMEN1	TATDN2	0.0045	0.573219	No
GenePair523	8522	10921	GAS7	RNPS1	0.0045	0.529602	No
GenePair524	8972	23165	MGAM	NUP205	0.0045	0.534198	No
GenePair525	11330	3959	CTRC	LGALS3BP	0.0044	0.55869	No
GenePair526	146225	100287932	CMTM2	TIMM23	0.0044	0.520333	No
GenePair527	400073	5910	C12orf76	RAP1GDS1	0.0044	0.471595	No
GenePair528	5874	55723	RAB27B	ASF1B	0.0044	0.470917	No
GenePair529	1602	9862	DACH1	MED24	0.0043	0.498093	No
GenePair530	284129	57510	SLC26A11	XPO5	0.0043	0.495861	No
GenePair531	402483	57062	LINC01000	DDX24	0.0043	0.558645	No
GenePair532	51380	1108	CSAD	CHD4	0.0043	0.5392	No
GenePair533	56034	23034	PDGFC	SAMD4A	0.0043	0.4799	No
GenePair534	7739	6730	ZNF185	SRP68	0.0043	0.582028	No
GenePair535	83999	91543	KREMEN1	RSAD2	0.0043	0.495117	No
GenePair536	140803	4939	TRPM6	OAS2	0.0042	0.535165	No
GenePair537	26873	3728	OPLAH	JUP	0.0042	0.486443	No
GenePair538	3687	4502	ITGAX	MT2A	0.0042	0.515848	No
GenePair539	57533	286530	TBC1D14	P2RY8	0.0042	0.544723	No
GenePair540	22884	26284	WDR37	ERAL1	0.004	0.559692	No
GenePair541	29767	653479	TMOD2	MRPL45P2	0.004	0.489859	No
GenePair542	56034	87178	PDGFC	PNPT1	0.004	0.488498	No
GenePair543	604	2023	BCL6	ENO1	0.004	0.504801	No
GenePair544	80325	5610	ABTB1	EIF2AK2	0.004	0.49199	No
GenePair545	146225	64326	CMTM2	COP1	0.0039	0.48631	No
GenePair546	359845	9688	RFLNB	NUP93	0.0039	0.487099	No
GenePair547	5836	94240	PYGL	EPSTI1	0.0039	0.480873	No
GenePair548	7273	10124	TTN	ARL4A	0.0039	0.515917	No
GenePair549	83999	23338	KREMEN1	JADE2	0.0039	0.510345	No
GenePair550	1602	26010	DACH1	SPATS2L	0.0038	0.498572	No
GenePair551	7059	23386	THBS3	NUDCD3	0.0038	0.530933	No
GenePair552	84669	8869	USP32	ST3GAL5	0.0038	0.523569	No
GenePair553	10205	83986	MPZL2	FAM234A	0.0037	0.455236	No
GenePair554	146225	5594	CMTM2	MAPK1	0.0037	0.467416	No
GenePair555	64332	5610	NFKBIZ	EIF2AK2	0.0037	0.500304	No
GenePair556	2273	4437	FHL1	MSH3	0.0036	0.489861	No
GenePair557	5724	10561	PTAFR	IFI44	0.0036	0.484331	No
GenePair558	58500	26608	ZNF250	TBL2	0.0036	0.506734	No
GenePair559	1232	54165	CCR3	DCUN1D1	0.0035	0.535273	No
GenePair560	163351	7841	GBP6	MOGS	0.0035	0.460934	No
GenePair561	5142	93974	PDE4B	ATP5IF1	0.0035	0.496233	No
GenePair562	58497	51651	PRUNE1	PTRH2	0.0035	0.480467	No
GenePair563	7739	3965	ZNF185	LGALS9	0.0035	0.616255	No
GenePair564	84795	9980	PYROXD2	DOPEY2	0.0035	0.453923	No
GenePair565	84925	3728	DIRC2	JUP	0.0035	0.519881	No
GenePair566	146223	29993	CMTM4	PACSIN1	0.0034	0.4799	No
GenePair567	26873	51284	OPLAH	TLR7	0.0034	0.483018	No
GenePair568	402483	4501	LINC01000	MT1X	0.0034	0.56625	No
GenePair569	58191	2537	CXCL16	IFI6	0.0034	0.527958	No
GenePair570	58497	9552	PRUNE1	SPAG7	0.0034	0.458181	No
GenePair571	83700	54617	JAM3	INO80	0.0034	0.603795	No
GenePair572	9169	1345	SCAF11	COX6C	0.0034	0.477499	No
GenePair573	9520	3587	NPEPPS	IL10RA	0.0034	0.504983	No
GenePair574	10079	23077	ATP9A	MYCBP2	0.0033	0.533467	No
GenePair575	10135	55748	NAMPT	CNDP2	0.0033	0.516826	No
GenePair576	2150	5935	F2RL1	RBM3	0.0033	0.485159	No
GenePair577	23531	2617	MMD	GARS	0.0033	0.50737	No
GenePair578	54602	653479	NDFIP2	MRPL45P2	0.0033	0.538792	No
GenePair579	57532	6464	NUFIP2	SHC1	0.0033	0.484139	No
GenePair580	5874	53	RAB27B	ACP2	0.0033	0.538023	No
GenePair581	729359	4495	PLIN4	MT1G	0.0033	0.559522	No
GenePair582	84669	55337	USP32	C19orf66	0.0033	0.56237	No
GenePair583	9061	950	PAPSS1	SCARB2	0.0033	0.546699	No
GenePair584	10284	5510	SAP18	PPP1R7	0.0032	0.524896	No
GenePair585	1071	29015	CETP	SLC43A3	0.0032	0.594935	No
GenePair586	55233	81892	MOB1A	SLIRP	0.0032	0.489997	No
GenePair587	5836	5610	PYGL	EIF2AK2	0.0032	0.482092	No
GenePair588	83700	28952	JAM3	CCDC22	0.0032	0.56127	No
GenePair589	83853	2067	ROPN1L	ERCC1	0.0032	0.548403	No
GenePair590	8436	11335	CAVIN2	CBX3	0.0032	0.453221	No
GenePair591	10205	55011	MPZL2	PIH1D1	0.0031	0.480596	No
GenePair592	11330	129607	CTRC	CMPK2	0.0031	0.486118	No
GenePair593	220042	955	DDIAS	ENTPD6	0.0031	0.500987	No
GenePair594	83862	64761	TMEM120A	PARP12	0.0031	0.499947	No
GenePair595	84669	6741	USP32	SSB	0.0031	0.54797	No
GenePair596	9061	10964	PAPSS1	IFI44L	0.0031	0.49007	No
GenePair597	9094	204	UNC119	AK2	0.0031	0.546084	No
GenePair598	9169	5695	SCAF11	PSMB7	0.0031	0.461356	No
GenePair599	116496	4599	FAM129A	MX1	0.003	0.516629	No
GenePair600	120425	3429	JAML	IFI27	0.003	0.542302	No
GenePair601	146225	3429	CMTM2	IFI27	0.003	0.551829	No
GenePair602	23483	117246	TGDS	FTSJ3	0.003	0.45791	No
GenePair603	3454	64761	IFNAR1	PARP12	0.003	0.529949	No
GenePair604	4048	3669	LTA4H	ISG20	0.003	0.473452	No
GenePair605	8675	539	STX16	ATP5PO	0.003	0.472561	No
GenePair606	9519	84661	TBPL1	DPY30	0.003	0.464632	No
GenePair607	9934	7443	P2RY14	VRK1	0.003	0.505078	No
GenePair608	23531	126328	MMD	NDUFA11	0.0029	0.47825	No
GenePair609	272	23328	AMPD3	SASH1	0.0029	0.494916	No
GenePair610	3613	51056	IMPA2	LAP3	0.0029	0.495126	No
GenePair611	5154	7841	PDGFA	MOGS	0.0029	0.471893	No
GenePair612	55788	476	LMBRD1	ATP1A1	0.0029	0.513536	No
GenePair613	56034	26123	PDGFC	TCTN3	0.0029	0.517493	No
GenePair614	57561	79228	ARRDC3	THOC6	0.0029	0.484321	No
GenePair615	57561	9980	ARRDC3	DOPEY2	0.0029	0.452603	No
GenePair616	7273	80310	TTN	PDGFD	0.0029	0.461567	No
GenePair617	83700	9031	JAM3	BAZ1B	0.0029	0.530817	No
GenePair618	83700	9552	JAM3	SPAG7	0.0029	0.551192	No
GenePair619	26873	79053	OPLAH	ALG8	0.0028	0.472689	No
GenePair620	27071	9031	DAPP1	BAZ1B	0.0028	0.482416	No
GenePair621	51380	219402	CSAD	MTIF3	0.0028	0.568817	No
GenePair622	5154	133957	PDGFA	CCDC127	0.0028	0.494668	No
GenePair623	58500	6173	ZNF250	RPL36A	0.0028	0.489089	No
GenePair624	6249	4938	CLIP1	OAS1	0.0028	0.472042	No
GenePair625	83700	11156	JAM3	PTP4A3	0.0028	0.571154	No
GenePair626	91662	3429	NLRP12	IFI27	0.0028	0.557118	No
GenePair627	23287	57062	AGTPBP1	DDX24	0.0027	0.499614	No
GenePair628	79663	51069	HSPBAP1	MRPL2	0.0027	0.506797	No
GenePair629	84669	3728	USP32	JUP	0.0027	0.575443	No
GenePair630	9934	55937	P2RY14	APOM	0.0027	0.479636	No
GenePair631	10079	9790	ATP9A	BMS1	0.0026	0.498122	No
GenePair632	1071	57510	CETP	XPO5	0.0026	0.526711	No
GenePair633	11275	9688	KLHL2	NUP93	0.0026	0.539961	No
GenePair634	134957	79035	STXBP5	NABP2	0.0026	0.498579	No
GenePair635	1602	387338	DACH1	NSUN4	0.0026	0.499686	No
GenePair636	23287	55163	AGTPBP1	PNPO	0.0026	0.486721	No
GenePair637	54602	4437	NDFIP2	MSH3	0.0026	0.450038	No
GenePair638	79007	55723	DBNDD1	ASF1B	0.0026	0.507986	No
GenePair639	79663	10939	HSPBAP1	AFG3L2	0.0026	0.547129	No
GenePair640	79899	55219	PRR5L	MACO1	0.0026	0.46674	No
GenePair641	11031	3429	RAB31	IFI27	0.0025	0.550376	No
GenePair642	117289	6728	TAGAP	SRP19	0.0025	0.500756	No
GenePair643	2162	593	F13A1	BCKDHA	0.0025	0.569094	No
GenePair644	29767	51668	TMOD2	HSPB11	0.0025	0.49342	No
GenePair645	54849	3128	DEF8	HLA-DRB6	0.0025	0.499127	No
GenePair646	7273	113263	TTN	GLCCI1	0.0025	0.487953	No
GenePair647	79722	3728	ANKRD55	JUP	0.0025	0.549787	No
GenePair648	79730	9381	NSUN7	OTOF	0.0025	0.500441	No
GenePair649	83999	285367	KREMEN1	RPUSD3	0.0025	0.530664	No
GenePair650	83999	4839	KREMEN1	NOP2	0.0025	0.560707	No
GenePair651	83999	64928	KREMEN1	MRPL14	0.0025	0.56561	No
GenePair652	8654	9641	PDE5A	IKBKE	0.0025	0.542092	No
GenePair653	120425	4599	JAML	MX1	0.0024	0.523594	No
GenePair654	137835	476	TMEM71	ATP1A1	0.0024	0.503198	No
GenePair655	163351	5875	GBP6	RABGGTA	0.0024	0.498011	No
GenePair656	26873	9381	OPLAH	OTOF	0.0024	0.473532	No
GenePair657	55884	4967	WSB2	OGDH	0.0024	0.545029	No
GenePair658	57136	1786	APMAP	DNMT1	0.0024	0.517439	No
GenePair659	58497	6734	PRUNE1	SRPRA	0.0024	0.539409	No
GenePair660	58500	8604	ZNF250	SLC25A12	0.0024	0.545001	No
GenePair661	59285	5875	CACNG6	RABGGTA	0.0024	0.508191	No
GenePair662	7273	79754	TTN	ASB13	0.0024	0.499693	No
GenePair663	7378	5610	UPP1	EIF2AK2	0.0024	0.495085	No
GenePair664	84795	50	PYROXD2	ACO2	0.0024	0.537033	No
GenePair665	8972	4704	MGAM	NDUFA9	0.0024	0.547845	No
GenePair666	23287	10561	AGTPBP1	IFI44	0.0023	0.490118	No
GenePair667	3566	3128	IL4R	HLA-DRB6	0.0023	0.519303	No
GenePair668	359845	3728	RFLNB	JUP	0.0023	0.485114	No
GenePair669	51635	10589	DHRS7	DRAP1	0.0023	0.501074	No
GenePair670	56996	54739	SLC12A9	XAF1	0.0023	0.519283	No
GenePair671	7273	133957	TTN	CCDC127	0.0023	0.495978	No
GenePair672	7739	114049	ZNF185	BUD23	0.0023	0.582363	No
GenePair673	79663	9797	HSPBAP1	TATDN2	0.0023	0.591321	No
GenePair674	8436	84661	CAVIN2	DPY30	0.0023	0.496018	No
GenePair675	84795	5935	PYROXD2	RBM3	0.0023	0.474666	No
GenePair676	84795	653479	PYROXD2	MRPL45P2	0.0023	0.574045	No
GenePair677	101	1509	ADAM8	CTSD	0.0022	0.469469	No
GenePair678	2273	51668	FHL1	HSPB11	0.0022	0.535939	No
GenePair679	3566	3429	IL4R	IFI27	0.0022	0.568641	No
GenePair680	3772	10493	KCNJ15	VAT1	0.0022	0.514529	No
GenePair681	415116	55337	PIM3	C19orf66	0.0022	0.552992	No
GenePair682	55276	51284	PGM2	TLR7	0.0022	0.497005	No
GenePair683	5724	950	PTAFR	SCARB2	0.0022	0.562649	No
GenePair684	83999	51075	KREMEN1	TMX2	0.0022	0.548919	No
GenePair685	84925	2067	DIRC2	ERCC1	0.0022	0.545469	No
GenePair686	8968	54165	HIST1H3F	DCUN1D1	0.0022	0.506346	No
GenePair687	9520	5905	NPEPPS	RANGAP1	0.0022	0.493876	No
GenePair688	133	537	ADM	ATP6AP1	0.0021	0.496668	No
GenePair689	136	26090	ADORA2B	ABHD12	0.0021	0.591488	No
GenePair690	2162	9343	F13A1	EFTUD2	0.0021	0.54584	No
GenePair691	286006	3959	LSMEM1	LGALS3BP	0.0021	0.580618	No
GenePair692	3553	5695	IL1B	PSMB7	0.0021	0.502945	No
GenePair693	3632	955	INPP5A	ENTPD6	0.0021	0.497536	No
GenePair694	3687	3429	ITGAX	IFI27	0.0021	0.571782	No
GenePair695	50862	955	RNF141	ENTPD6	0.0021	0.491454	No
GenePair696	51380	57461	CSAD	ISY1	0.0021	0.542772	No
GenePair697	54849	3429	DEF8	IFI27	0.0021	0.570149	No
GenePair698	55909	1025	BIN3	CDK9	0.0021	0.55684	No
GenePair699	59285	79411	CACNG6	GLB1L	0.0021	0.512867	No
GenePair700	79188	23019	TMEM43	CNOT1	0.0021	0.496883	No
GenePair701	8334	7384	HIST1H2AC	UQCRC1	0.0021	0.491771	No
GenePair702	8612	3728	PLPP2	JUP	0.0021	0.579407	No
GenePair703	9170	396	LPAR2	ARHGDIA	0.0021	0.570239	No
GenePair704	9170	7384	LPAR2	UQCRC1	0.0021	0.533479	No
GenePair705	9934	29015	P2RY14	SLC43A3	0.0021	0.512981	No
GenePair706	10126	5708	DNAL4	PSMD2	0.002	0.468541	No
GenePair707	11031	4061	RAB31	LY6E	0.002	0.526831	No
GenePair708	1232	2171	CCR3	FABP5	0.002	0.499658	No
GenePair709	136	4495	ADORA2B	MT1G	0.002	0.524392	No
GenePair710	146225	6628	CMTM2	SNRPB	0.002	0.550536	No
GenePair711	1602	28989	DACH1	NTMT1	0.002	0.4979	No
GenePair712	2150	6720	F2RL1	SREBF1	0.002	0.555508	No
GenePair713	3613	8175	IMPA2	SF3A2	0.002	0.495777	No
GenePair714	51439	54165	FAM8A1	DCUN1D1	0.002	0.498795	No
GenePair715	5154	10124	PDGFA	ARL4A	0.002	0.531052	No
GenePair716	56911	4724	MAP3K7CL	NDUFS4	0.002	0.455665	No
GenePair717	5724	9636	PTAFR	ISG15	0.002	0.522855	No
GenePair718	5874	5910	RAB27B	RAP1GDS1	0.002	0.52231	No
GenePair719	6500	81892	SKP1	SLIRP	0.002	0.469015	No
GenePair720	8277	55723	TKTL1	ASF1B	0.002	0.500195	No
GenePair721	8555	51098	CDC14B	IFT52	0.002	0.471018	No
GenePair722	8968	4724	HIST1H3F	NDUFS4	0.002	0.504523	No
GenePair723	9519	57461	TBPL1	ISY1	0.002	0.456328	No
GenePair724	1602	54617	DACH1	INO80	0.0019	0.507449	No
GenePair725	29035	9636	C16orf72	ISG15	0.0019	0.501846	No
GenePair726	29767	2975	TMOD2	GTF3C1	0.0019	0.494193	No
GenePair727	29978	7384	UBQLN2	UQCRC1	0.0019	0.515431	No
GenePair728	3556	79035	IL1RAP	NABP2	0.0019	0.53266	No
GenePair729	3556	79443	IL1RAP	FYCO1	0.0019	0.549544	No
GenePair730	3556	8914	IL1RAP	TIMELESS	0.0019	0.549533	No
GenePair731	54820	476	NDE1	ATP1A1	0.0019	0.529192	No
GenePair732	55096	10921	EBLN2	RNPS1	0.0019	0.534853	No
GenePair733	7273	50	TTN	ACO2	0.0019	0.517591	No
GenePair734	7273	51098	TTN	IFT52	0.0019	0.488561	No
GenePair735	7739	7965	ZNF185	AIMP2	0.0019	0.532064	No
GenePair736	80094	117246	BIN3-IT1	FTSJ3	0.0019	0.541505	No
GenePair737	80726	55723	IQCN	ASF1B	0.0019	0.495257	No
GenePair738	9489	3429	PGS1	IFI27	0.0019	0.535023	No
GenePair739	9520	4938	NPEPPS	OAS1	0.0019	0.458459	No
GenePair740	1071	79050	CETP	NOC4L	0.0018	0.566892	No
GenePair741	165140	4939	OXER1	OAS2	0.0018	0.518377	No
GenePair742	2162	9797	F13A1	TATDN2	0.0018	0.591879	No
GenePair743	220213	51284	OTUD1	TLR7	0.0018	0.51415	No
GenePair744	2273	9031	FHL1	BAZ1B	0.0018	0.517156	No
GenePair745	27071	55723	DAPP1	ASF1B	0.0018	0.493983	No
GenePair746	3614	55748	IMPDH1	CNDP2	0.0018	0.511642	No
GenePair747	5055	29078	SERPINB2	NDUFAF4	0.0018	0.528735	No
GenePair748	57561	23179	ARRDC3	RGL1	0.0018	0.498409	No
GenePair749	58497	57466	PRUNE1	SCAF4	0.0018	0.499878	No
GenePair750	58500	488	ZNF250	ATP2A2	0.0018	0.520281	No
GenePair751	5874	5025	RAB27B	P2RX4	0.0018	0.498151	No
GenePair752	7292	23179	TNFSF4	RGL1	0.0018	0.575964	No
GenePair753	79188	2734	TMEM43	GLG1	0.0018	0.530055	No
GenePair754	79730	79035	NSUN7	NABP2	0.0018	0.531923	No
GenePair755	81027	27089	TUBB1	UQCRQ	0.0018	0.482323	No
GenePair756	83700	117246	JAM3	FTSJ3	0.0018	0.579516	No
GenePair757	84519	3191	ACRBP	HNRNPL	0.0018	0.473926	No
GenePair758	84669	285367	USP32	RPUSD3	0.0018	0.554933	No
GenePair759	8968	10084	HIST1H3F	PQBP1	0.0018	0.503951	No
GenePair760	9519	10007	TBPL1	GNPDA1	0.0018	0.550967	No
GenePair761	116496	4061	FAM129A	LY6E	0.0017	0.519189	No
GenePair762	117289	29093	TAGAP	MRPL22	0.0017	0.501376	No
GenePair763	120425	2023	JAML	ENO1	0.0017	0.567684	No
GenePair764	163351	2187	GBP6	FANCB	0.0017	0.461943	No
GenePair765	199675	4061	MCEMP1	LY6E	0.0017	0.508922	No
GenePair766	249	4599	ALPL	MX1	0.0017	0.483814	No
GenePair767	3104	54808	ZBTB48	DYM	0.0017	0.509237	No
GenePair768	64127	51023	NOD2	MRPS18C	0.0017	0.480485	No
GenePair769	7739	55615	ZNF185	PRR5	0.0017	0.515576	No
GenePair770	79651	476	RHBDF2	ATP1A1	0.0017	0.503172	No
GenePair771	8360	2187	HIST1H4D	FANCB	0.0017	0.480982	No
GenePair772	83700	9670	JAM3	IPO13	0.0017	0.614178	No
GenePair773	8436	56945	CAVIN2	MRPS22	0.0017	0.528181	No
GenePair774	84795	2975	PYROXD2	GTF3C1	0.0017	0.580155	No
GenePair775	8870	3587	IER3	IL10RA	0.0017	0.489849	No
GenePair776	8968	5510	HIST1H3F	PPP1R7	0.0017	0.514642	No
GenePair777	9519	7037	TBPL1	TFRC	0.0017	0.492964	No
GenePair778	11031	10589	RAB31	DRAP1	0.0016	0.495273	No
GenePair779	11330	4495	CTRC	MT1G	0.0016	0.510622	No
GenePair780	136	79050	ADORA2B	NOC4L	0.0016	0.572552	No
GenePair781	146225	2537	CMTM2	IFI6	0.0016	0.505931	No
GenePair782	2162	821	F13A1	CANX	0.0016	0.489527	No
GenePair783	3613	2130	IMPA2	EWSR1	0.0016	0.5219	No
GenePair784	51062	55219	ATL1	MACO1	0.0016	0.480696	No
GenePair785	54602	2171	NDFIP2	FABP5	0.0016	0.541025	No
GenePair786	55002	256281	TMCO3	NUDT14	0.0016	0.499403	No
GenePair787	64332	54739	NFKBIZ	XAF1	0.0016	0.493398	No
GenePair788	7273	2187	TTN	FANCB	0.0016	0.475421	No
GenePair789	7273	6173	TTN	RPL36A	0.0016	0.510052	No
GenePair790	7940	4061	LST1	LY6E	0.0016	0.558574	No
GenePair791	83862	10964	TMEM120A	IFI44L	0.0016	0.494057	No
GenePair792	8654	54867	PDE5A	TMEM214	0.0016	0.523664	No
GenePair793	8843	387893	HCAR3	KMT5A	0.0016	0.461202	No
GenePair794	8843	5025	HCAR3	P2RX4	0.0016	0.48208	No
GenePair795	8843	7515	HCAR3	XRCC1	0.0016	0.486329	No
GenePair796	8843	8269	HCAR3	TMEM187	0.0016	0.491661	No
GenePair797	9061	56984	PAPSS1	PSMG2	0.0016	0.563779	No
GenePair798	10135	10589	NAMPT	DRAP1	0.0015	0.563575	No
GenePair799	1602	256281	DACH1	NUDT14	0.0015	0.520469	No
GenePair800	26873	9688	OPLAH	NUP93	0.0015	0.481857	No
GenePair801	272	87178	AMPD3	PNPT1	0.0015	0.503702	No
GenePair802	5055	129607	SERPINB2	CMPK2	0.0015	0.488445	No
GenePair803	5055	87178	SERPINB2	PNPT1	0.0015	0.52404	No
GenePair804	55276	285367	PGM2	RPUSD3	0.0015	0.503048	No
GenePair805	57532	5701	NUFIP2	PSMC2	0.0015	0.526316	No
GenePair806	5874	51121	RAB27B	RPL26L1	0.0015	0.509686	No
GenePair807	7739	3005	ZNF185	H1F0	0.0015	0.655157	No
GenePair808	7739	4839	ZNF185	NOP2	0.0015	0.572375	No
GenePair809	8875	3429	VNN2	IFI27	0.0015	0.582746	No
GenePair810	8972	91543	MGAM	RSAD2	0.0015	0.487584	No
GenePair811	9519	219402	TBPL1	MTIF3	0.0015	0.469535	No
GenePair812	9588	1870	PRDX6	E2F2	0.0015	0.549421	No
GenePair813	9778	57510	KIAA0232	XPO5	0.0015	0.540415	No
GenePair814	10205	2519	MPZL2	FUCA2	0.0014	0.467418	No
GenePair815	123041	51531	SLC24A4	TRMO	0.0014	0.529759	No
GenePair816	1232	84987	CCR3	COX14	0.0014	0.485727	No
GenePair817	136	7517	ADORA2B	XRCC3	0.0014	0.543228	No
GenePair818	220213	6520	OTUD1	SLC3A2	0.0014	0.566341	No
GenePair819	23287	9410	AGTPBP1	SNRNP40	0.0014	0.531741	No
GenePair820	3985	3728	LIMK2	JUP	0.0014	0.566529	No
GenePair821	57532	6921	NUFIP2	ELOC	0.0014	0.478035	No
GenePair822	58497	1778	PRUNE1	DYNC1H1	0.0014	0.47654	No
GenePair823	654	79228	BMP6	THOC6	0.0014	0.472581	No
GenePair824	7059	9862	THBS3	MED24	0.0014	0.511352	No
GenePair825	7273	23179	TTN	RGL1	0.0014	0.522521	No
GenePair826	7273	494514	TTN	TYMSOS	0.0014	0.478314	No
GenePair827	7273	51062	TTN	ATL1	0.0014	0.455305	No
GenePair828	83700	56478	JAM3	EIF4ENIF1	0.0014	0.555859	No
GenePair829	83853	9410	ROPN1L	SNRNP40	0.0014	0.52413	No
GenePair830	8848	5279	TSC22D1	PIGC	0.0014	0.473059	No
GenePair831	9519	3191	TBPL1	HNRNPL	0.0014	0.489065	No
GenePair832	10135	4061	NAMPT	LY6E	0.0013	0.582599	No
GenePair833	10205	9031	MPZL2	BAZ1B	0.0013	0.465587	No
GenePair834	10284	51651	SAP18	PTRH2	0.0013	0.504933	No
GenePair835	10857	1345	PGRMC1	COX6C	0.0013	0.479894	No
GenePair836	1232	6720	CCR3	SREBF1	0.0013	0.487687	No
GenePair837	1602	9641	DACH1	IKBKE	0.0013	0.53245	No
GenePair838	23483	56919	TGDS	DHX33	0.0013	0.466182	No
GenePair839	23483	9641	TGDS	IKBKE	0.0013	0.504351	No
GenePair840	26873	10384	OPLAH	BTN3A3	0.0013	0.479527	No
GenePair841	2982	83986	GUCY1A1	FAM234A	0.0013	0.467997	No
GenePair842	3101	4502	HK3	MT2A	0.0013	0.501823	No
GenePair843	3104	5708	ZBTB48	PSMD2	0.0013	0.53879	No
GenePair844	3613	10964	IMPA2	IFI44L	0.0013	0.47557	No
GenePair845	400073	6520	C12orf76	SLC3A2	0.0013	0.550579	No
GenePair846	415116	4938	PIM3	OAS1	0.0013	0.507849	No
GenePair847	51380	2821	CSAD	GPI	0.0013	0.490152	No
GenePair848	51706	5905	CYB5R1	RANGAP1	0.0013	0.486085	No
GenePair849	55002	113829	TMCO3	SLC35A4	0.0013	0.519331	No
GenePair850	57532	113802	NUFIP2	HENMT1	0.0013	0.455495	No
GenePair851	6500	51023	SKP1	MRPS18C	0.0013	0.480533	No
GenePair852	7273	23600	TTN	AMACR	0.0013	0.504831	No
GenePair853	7739	2821	ZNF185	GPI	0.0013	0.621249	No
GenePair854	80726	83986	IQCN	FAM234A	0.0013	0.463261	No
GenePair855	8843	5271	HCAR3	SERPINB8	0.0013	0.45755	No
GenePair856	9519	93974	TBPL1	ATP5IF1	0.0013	0.47213	No
GenePair857	9934	79050	P2RY14	NOC4L	0.0013	0.58334	No
GenePair858	10079	3418	ATP9A	IDH2	0.0012	0.487805	No
GenePair859	10205	2171	MPZL2	FABP5	0.0012	0.488594	No
GenePair860	1071	22845	CETP	DOLK	0.0012	0.565135	No
GenePair861	136	29015	ADORA2B	SLC43A3	0.0012	0.600369	No
GenePair862	2162	140465	F13A1	MYL6B	0.0012	0.499443	No
GenePair863	3566	2537	IL4R	IFI6	0.0012	0.508969	No
GenePair864	400073	57466	C12orf76	SCAF4	0.0012	0.480655	No
GenePair865	51062	116832	ATL1	RPL39L	0.0012	0.498935	No
GenePair866	51706	7965	CYB5R1	AIMP2	0.0012	0.478998	No
GenePair867	57533	950	TBC1D14	SCARB2	0.0012	0.559043	No
GenePair868	58497	1606	PRUNE1	DGKA	0.0012	0.49461	No
GenePair869	58497	7531	PRUNE1	YWHAE	0.0012	0.503065	No
GenePair870	7378	4061	UPP1	LY6E	0.0012	0.537366	No
GenePair871	7752	4724	ZNF200	NDUFS4	0.0012	0.494325	No
GenePair872	79887	4061	PLBD1	LY6E	0.0012	0.497021	No
GenePair873	8360	5875	HIST1H4D	RABGGTA	0.0012	0.507124	No
GenePair874	84795	117246	PYROXD2	FTSJ3	0.0012	0.491595	No
GenePair875	84795	6173	PYROXD2	RPL36A	0.0012	0.481188	No
GenePair876	84925	3005	DIRC2	H1F0	0.0012	0.621272	No
GenePair877	9170	79002	LPAR2	TRIR	0.0012	0.51167	No
GenePair878	10135	3669	NAMPT	ISG20	0.0011	0.519479	No
GenePair879	10434	3728	LYPLA1	JUP	0.0011	0.544676	No
GenePair880	11275	23165	KLHL2	NUP205	0.0011	0.550497	No
GenePair881	1232	27258	CCR3	LSM3	0.0011	0.480047	No
GenePair882	1602	10915	DACH1	TCERG1	0.0011	0.49846	No
GenePair883	1845	476	DUSP3	ATP1A1	0.0011	0.493941	No
GenePair884	2162	1108	F13A1	CHD4	0.0011	0.569315	No
GenePair885	2180	25824	ACSL1	PRDX5	0.0011	0.486902	No
GenePair886	3087	10561	HHEX	IFI44	0.0011	0.509178	No
GenePair887	3693	9332	ITGB5	CD163	0.0011	0.496345	No
GenePair888	55884	54165	WSB2	DCUN1D1	0.0011	0.590429	No
GenePair889	57136	10964	APMAP	IFI44L	0.0011	0.484615	No
GenePair890	59285	131076	CACNG6	CCDC58	0.0011	0.459512	No
GenePair891	59285	494514	CACNG6	TYMSOS	0.0011	0.466751	No
GenePair892	6500	11335	SKP1	CBX3	0.0011	0.460757	No
GenePair893	654	117246	BMP6	FTSJ3	0.0011	0.467339	No
GenePair894	6583	7384	SLC22A4	UQCRC1	0.0011	0.533323	No
GenePair895	6652	81892	SORD	SLIRP	0.0011	0.476342	No
GenePair896	7273	116832	TTN	RPL39L	0.0011	0.465332	No
GenePair897	7273	6522	TTN	SLC4A2	0.0011	0.490684	No
GenePair898	7273	79630	TTN	C1orf54	0.0011	0.50239	No
GenePair899	7739	8454	ZNF185	CUL1	0.0011	0.501033	No
GenePair900	8277	117246	TKTL1	FTSJ3	0.0011	0.476782	No
GenePair901	8360	23093	HIST1H4D	TTLL5	0.0011	0.480266	No
GenePair902	83700	53	JAM3	ACP2	0.0011	0.568514	No
GenePair903	83700	8226	JAM3	PUDP	0.0011	0.514389	No
GenePair904	8436	6500	CAVIN2	SKP1	0.0011	0.455404	No
GenePair905	84669	10384	USP32	BTN3A3	0.0011	0.511486	No
GenePair906	84925	55177	DIRC2	RMDN3	0.0011	0.496508	No
GenePair907	8522	204	GAS7	AK2	0.0011	0.50436	No
GenePair908	8555	10124	CDC14B	ARL4A	0.0011	0.537853	No
GenePair909	8972	204	MGAM	AK2	0.0011	0.515782	No
GenePair910	8972	3728	MGAM	JUP	0.0011	0.523402	No
GenePair911	9519	55257	TBPL1	MRGBP	0.0011	0.462991	No
GenePair912	9658	23328	ZNF516	SASH1	0.0011	0.481676	No
GenePair913	9934	113263	P2RY14	GLCCI1	0.0011	0.502364	No
GenePair914	10087	64761	COL4A3BP	PARP12	0.001	0.495931	No
GenePair915	10313	3429	RTN3	IFI27	0.001	0.552782	No
GenePair916	10908	4502	PNPLA6	MT2A	0.001	0.505777	No
GenePair917	117289	9453	TAGAP	GGPS1	0.001	0.480613	No
GenePair918	1232	53	CCR3	ACP2	0.001	0.501196	No
GenePair919	165140	9862	OXER1	MED24	0.001	0.534535	No
GenePair920	220042	387338	DDIAS	NSUN4	0.001	0.497342	No
GenePair921	2273	117246	FHL1	FTSJ3	0.001	0.523094	No
GenePair922	25805	117246	BAMBI	FTSJ3	0.001	0.528726	No
GenePair923	26873	4682	OPLAH	NUBP1	0.001	0.472497	No
GenePair924	27018	1345	BEX3	COX6C	0.001	0.476843	No
GenePair925	29767	26608	TMOD2	TBL2	0.001	0.461698	No
GenePair926	3556	139341	IL1RAP	FUNDC1	0.001	0.563983	No
GenePair927	359845	4493	RFLNB	MT1E	0.001	0.479068	No
GenePair928	359845	4682	RFLNB	NUBP1	0.001	0.468101	No
GenePair929	54602	10927	NDFIP2	SPIN1	0.001	0.517882	No
GenePair930	55002	3418	TMCO3	IDH2	0.001	0.518307	No
GenePair931	55276	55149	PGM2	MTPAP	0.001	0.518291	No
GenePair932	55788	539	LMBRD1	ATP5PO	0.001	0.496807	No
GenePair933	5724	151306	PTAFR	GPBAR1	0.001	0.542288	No
GenePair934	57532	372	NUFIP2	ARCN1	0.001	0.484554	No
GenePair935	57533	10007	TBC1D14	GNPDA1	0.001	0.55562	No
GenePair936	58500	5333	ZNF250	PLCD1	0.001	0.526502	No
GenePair937	5874	4125	RAB27B	MAN2B1	0.001	0.465248	No
GenePair938	5874	7531	RAB27B	YWHAE	0.001	0.520946	No
GenePair939	5874	81502	RAB27B	HM13	0.001	0.49896	No
GenePair940	59285	78995	CACNG6	C17orf53	0.001	0.495335	No
GenePair941	6392	81892	SDHD	SLIRP	0.001	0.474131	No
GenePair942	6500	93974	SKP1	ATP5IF1	0.001	0.455289	No
GenePair943	6732	5184	SRPK1	PEPD	0.001	0.518242	No
GenePair944	7273	10523	TTN	CHERP	0.001	0.484491	No
GenePair945	7273	284119	TTN	CAVIN1	0.001	0.457845	No
GenePair946	7292	50	TNFSF4	ACO2	0.001	0.544238	No
GenePair947	729359	6355	PLIN4	CCL8	0.001	0.471177	No
GenePair948	7739	3191	ZNF185	HNRNPL	0.001	0.659487	No
GenePair949	7752	2475	ZNF200	MTOR	0.001	0.514801	No
GenePair950	79623	29993	GALNT14	PACSIN1	0.001	0.473188	No
GenePair951	79663	4493	HSPBAP1	MT1E	0.001	0.478677	No
GenePair952	79663	51654	HSPBAP1	CDK5RAP1	0.001	0.503539	No
GenePair953	79663	8869	HSPBAP1	ST3GAL5	0.001	0.483462	No
GenePair954	83853	1211	ROPN1L	CLTA	0.001	0.536612	No
GenePair955	83853	26284	ROPN1L	ERAL1	0.001	0.533934	No
GenePair956	83853	55615	ROPN1L	PRR5	0.001	0.50612	No
GenePair957	84519	56943	ACRBP	ENY2	0.001	0.447298	No
GenePair958	84669	51493	USP32	RTCB	0.001	0.551776	No
GenePair959	84795	25906	PYROXD2	ANAPC15	0.001	0.450825	No
GenePair960	84925	8869	DIRC2	ST3GAL5	0.001	0.474363	No
GenePair961	8843	54187	HCAR3	NANS	0.001	0.474909	No
GenePair962	8870	27338	IER3	UBE2S	0.001	0.5731	No
GenePair963	8875	55748	VNN2	CNDP2	0.001	0.520747	No
GenePair964	9016	4724	SLC25A14	NDUFS4	0.001	0.497037	No
GenePair965	9934	29890	P2RY14	RBM15B	0.001	0.523239	No
GenePair966	9934	5553	P2RY14	PRG2	0.001	0.486904	No
GenePair967	10079	23165	ATP9A	NUP205	0.0009	0.51729	No
GenePair968	10079	51075	ATP9A	TMX2	0.0009	0.504466	No
GenePair969	101	522	ADAM8	ATP5PF	0.0009	0.518792	No
GenePair970	10205	1017	MPZL2	CDK2	0.0009	0.497328	No
GenePair971	10205	54617	MPZL2	INO80	0.0009	0.462703	No
GenePair972	10205	56478	MPZL2	EIF4ENIF1	0.0009	0.470572	No
GenePair973	10672	5695	GNA13	PSMB7	0.0009	0.512995	No
GenePair974	1071	7517	CETP	XRCC3	0.0009	0.524858	No
GenePair975	117289	93974	TAGAP	ATP5IF1	0.0009	0.465473	No
GenePair976	120425	3113	JAML	HLA-DPA1	0.0009	0.528848	No
GenePair977	140803	9381	TRPM6	OTOF	0.0009	0.518752	No
GenePair978	2150	9031	F2RL1	BAZ1B	0.0009	0.525144	No
GenePair979	23287	4501	AGTPBP1	MT1X	0.0009	0.499318	No
GenePair980	26502	64761	NARF	PARP12	0.0009	0.472002	No
GenePair981	27071	4864	DAPP1	NPC1	0.0009	0.477142	No
GenePair982	27180	3728	SIGLEC9	JUP	0.0009	0.549585	No
GenePair983	272	29993	AMPD3	PACSIN1	0.0009	0.479881	No
GenePair984	29035	6240	C16orf72	RRM1	0.0009	0.540218	No
GenePair985	3556	22845	IL1RAP	DOLK	0.0009	0.543887	No
GenePair986	359845	23338	RFLNB	JADE2	0.0009	0.466073	No
GenePair987	359845	6520	RFLNB	SLC3A2	0.0009	0.487206	No
GenePair988	4638	23093	MYLK	TTLL5	0.0009	0.477331	No
GenePair989	5256	55163	PHKA2	PNPO	0.0009	0.483728	No
GenePair990	54602	10671	NDFIP2	DCTN6	0.0009	0.511887	No
GenePair991	55002	4682	TMCO3	NUBP1	0.0009	0.484236	No
GenePair992	55096	4938	EBLN2	OAS1	0.0009	0.492714	No
GenePair993	5747	4724	PTK2	NDUFS4	0.0009	0.473722	No
GenePair994	58500	10124	ZNF250	ARL4A	0.0009	0.524042	No
GenePair995	7059	23357	THBS3	ANGEL1	0.0009	0.506416	No
GenePair996	7059	9381	THBS3	OTOF	0.0009	0.472796	No
GenePair997	7273	51002	TTN	TPRKB	0.0009	0.49684	No
GenePair998	7273	79603	TTN	CERS4	0.0009	0.477613	No
GenePair999	7292	79228	TNFSF4	THOC6	0.0009	0.506537	No
GenePair1000	79188	7384	TMEM43	UQCRC1	0.0009	0.449043	No
GenePair1001	80228	955	ORAI2	ENTPD6	0.0009	0.485657	No
GenePair1002	83853	10195	ROPN1L	ALG3	0.0009	0.511578	No
GenePair1003	83853	3965	ROPN1L	LGALS9	0.0009	0.538207	No
GenePair1004	84661	81892	DPY30	SLIRP	0.0009	0.477337	No
GenePair1005	84669	23165	USP32	NUP205	0.0009	0.549647	No
GenePair1006	84669	91543	USP32	RSAD2	0.0009	0.472872	No
GenePair1007	84795	79102	PYROXD2	RNF26	0.0009	0.568616	No
GenePair1008	9658	29993	ZNF516	PACSIN1	0.0009	0.490969	No
GenePair1009	9766	64761	SUSD6	PARP12	0.0009	0.544177	No
GenePair1010	10079	55337	ATP9A	C19orf66	0.0008	0.499386	No
GenePair1011	10126	4724	DNAL4	NDUFS4	0.0008	0.487944	No
GenePair1012	10135	3429	NAMPT	IFI27	0.0008	0.546789	No
GenePair1013	10857	51079	PGRMC1	NDUFA13	0.0008	0.485239	No
GenePair1014	1232	1606	CCR3	DGKA	0.0008	0.499395	No
GenePair1015	1232	56919	CCR3	DHX33	0.0008	0.460761	No
GenePair1016	163351	23093	GBP6	TTLL5	0.0008	0.468518	No
GenePair1017	220042	14	DDIAS	AAMP	0.0008	0.516903	No
GenePair1018	23483	8226	TGDS	PUDP	0.0008	0.463202	No
GenePair1019	26502	28958	NARF	COA3	0.0008	0.50888	No
GenePair1020	26873	55337	OPLAH	C19orf66	0.0008	0.487147	No
GenePair1021	272	6355	AMPD3	CCL8	0.0008	0.468992	No
GenePair1022	284129	152100	SLC26A11	CMC1	0.0008	0.551182	No
GenePair1023	29767	84320	TMOD2	ACBD6	0.0008	0.472384	No
GenePair1024	3613	22827	IMPA2	PUF60	0.0008	0.530282	No
GenePair1025	3632	4493	INPP5A	MT1E	0.0008	0.546498	No
GenePair1026	400073	27258	C12orf76	LSM3	0.0008	0.450566	No
GenePair1027	4638	10124	MYLK	ARL4A	0.0008	0.530644	No
GenePair1028	50862	14	RNF141	AAMP	0.0008	0.535164	No
GenePair1029	50862	3728	RNF141	JUP	0.0008	0.522	No
GenePair1030	51706	10921	CYB5R1	RNPS1	0.0008	0.511949	No
GenePair1031	51706	2067	CYB5R1	ERCC1	0.0008	0.49367	No
GenePair1032	5256	4938	PHKA2	OAS1	0.0008	0.475405	No
GenePair1033	54602	9031	NDFIP2	BAZ1B	0.0008	0.476066	No
GenePair1034	55002	920	TMCO3	CD4	0.0008	0.512848	No
GenePair1035	55096	5905	EBLN2	RANGAP1	0.0008	0.511588	No
GenePair1036	55884	4724	WSB2	NDUFS4	0.0008	0.567913	No
GenePair1037	55909	4967	BIN3	OGDH	0.0008	0.498105	No
GenePair1038	56034	79102	PDGFC	RNF26	0.0008	0.572227	No
GenePair1039	56996	2130	SLC12A9	EWSR1	0.0008	0.577139	No
GenePair1040	56996	5315	SLC12A9	PKM	0.0008	0.54777	No
GenePair1041	57533	4501	TBC1D14	MT1X	0.0008	0.52446	No
GenePair1042	57700	5695	FAM160B1	PSMB7	0.0008	0.527393	No
GenePair1043	58500	55840	ZNF250	EAF2	0.0008	0.492808	No
GenePair1044	5874	4724	RAB27B	NDUFS4	0.0008	0.507065	No
GenePair1045	6249	3587	CLIP1	IL10RA	0.0008	0.497251	No
GenePair1046	6249	5096	CLIP1	PCCB	0.0008	0.493901	No
GenePair1047	6500	56945	SKP1	MRPS22	0.0008	0.507698	No
GenePair1048	654	55723	BMP6	ASF1B	0.0008	0.521195	No
GenePair1049	6652	404672	SORD	GTF2H5	0.0008	0.464184	No
GenePair1050	6732	474344	SRPK1	GIMAP6	0.0008	0.509338	No
GenePair1051	6732	6240	SRPK1	RRM1	0.0008	0.537507	No
GenePair1052	7292	26608	TNFSF4	TBL2	0.0008	0.48016	No
GenePair1053	7378	94240	UPP1	EPSTI1	0.0008	0.490344	No
GenePair1054	79623	4495	GALNT14	MT1G	0.0008	0.527952	No
GenePair1055	79887	3669	PLBD1	ISG20	0.0008	0.478054	No
GenePair1056	81027	521	TUBB1	ATP5ME	0.0008	0.477325	No
GenePair1057	83700	7347	JAM3	UCHL3	0.0008	0.572537	No
GenePair1058	83999	4704	KREMEN1	NDUFA9	0.0008	0.575727	No
GenePair1059	84649	955	DGAT2	ENTPD6	0.0008	0.55323	No
GenePair1060	8843	117246	HCAR3	FTSJ3	0.0008	0.468402	No
GenePair1061	8843	9670	HCAR3	IPO13	0.0008	0.472472	No
GenePair1062	8870	10964	IER3	IFI44L	0.0008	0.498022	No
GenePair1063	8968	1025	HIST1H3F	CDK9	0.0008	0.482945	No
GenePair1064	8972	8869	MGAM	ST3GAL5	0.0008	0.499522	No
GenePair1065	9061	474344	PAPSS1	GIMAP6	0.0008	0.491349	No
GenePair1066	9170	1509	LPAR2	CTSD	0.0008	0.474226	No
GenePair1067	94240	3429	EPSTI1	IFI27	0.0008	0.5794	No
GenePair1068	9520	5184	NPEPPS	PEPD	0.0008	0.506821	No
GenePair1069	9520	55163	NPEPPS	PNPO	0.0008	0.476957	No
GenePair1070	960	55303	CD44	GIMAP4	0.0008	0.482857	No
GenePair1071	9704	1025	DHX34	CDK9	0.0008	0.523817	No
GenePair1072	9934	286053	P2RY14	NSMCE2	0.0008	0.490171	No
GenePair1073	10100	23328	TSPAN2	SASH1	0.0007	0.529912	No
GenePair1074	10126	6728	DNAL4	SRP19	0.0007	0.492676	No
GenePair1075	10205	53	MPZL2	ACP2	0.0007	0.508654	No
GenePair1076	1071	219855	CETP	SLC37A2	0.0007	0.551233	No
GenePair1077	11275	6741	KLHL2	SSB	0.0007	0.551271	No
GenePair1078	1232	84233	CCR3	TMEM126A	0.0007	0.533656	No
GenePair1079	132160	4061	PPM1M	LY6E	0.0007	0.585749	No
GenePair1080	136	2146	ADORA2B	EZH2	0.0007	0.568792	No
GenePair1081	140885	3669	SIRPA	ISG20	0.0007	0.475259	No
GenePair1082	146225	2130	CMTM2	EWSR1	0.0007	0.533764	No
GenePair1083	146225	4502	CMTM2	MT2A	0.0007	0.511704	No
GenePair1084	1602	79132	DACH1	DHX58	0.0007	0.499302	No
GenePair1085	2150	11156	F2RL1	PTP4A3	0.0007	0.538974	No
GenePair1086	220042	83743	DDIAS	GRWD1	0.0007	0.48236	No
GenePair1087	23012	7841	STK38L	MOGS	0.0007	0.470056	No
GenePair1088	23287	8886	AGTPBP1	DDX18	0.0007	0.515624	No
GenePair1089	25907	9797	TMEM158	TATDN2	0.0007	0.482791	No
GenePair1090	29035	3429	C16orf72	IFI27	0.0007	0.579425	No
GenePair1091	2982	6720	GUCY1A1	SREBF1	0.0007	0.465975	No
GenePair1092	3475	93974	IFRD1	ATP5IF1	0.0007	0.513389	No
GenePair1093	3566	1870	IL4R	E2F2	0.0007	0.64684	No
GenePair1094	402483	5096	LINC01000	PCCB	0.0007	0.554852	No
GenePair1095	4638	78995	MYLK	C17orf53	0.0007	0.465513	No
GenePair1096	4917	4939	NTN3	OAS2	0.0007	0.536773	No
GenePair1097	51706	4521	CYB5R1	NUDT1	0.0007	0.500212	No
GenePair1098	528	83743	ATP6V1C1	GRWD1	0.0007	0.527437	No
GenePair1099	5355	474344	PLP2	GIMAP6	0.0007	0.476679	No
GenePair1100	54602	79443	NDFIP2	FYCO1	0.0007	0.582786	No
GenePair1101	54602	9055	NDFIP2	PRC1	0.0007	0.523816	No
GenePair1102	55909	4724	BIN3	NDUFS4	0.0007	0.521169	No
GenePair1103	56897	93974	WRNIP1	ATP5IF1	0.0007	0.469721	No
GenePair1104	57561	1857	ARRDC3	DVL3	0.0007	0.452738	No
GenePair1105	58497	10084	PRUNE1	PQBP1	0.0007	0.491221	No
GenePair1106	5874	10084	RAB27B	PQBP1	0.0007	0.516276	No
GenePair1107	60675	2597	PROK2	GAPDH	0.0007	0.477505	No
GenePair1108	654	51668	BMP6	HSPB11	0.0007	0.476497	No
GenePair1109	7059	8607	THBS3	RUVBL1	0.0007	0.522288	No
GenePair1110	7273	78995	TTN	C17orf53	0.0007	0.470463	No
GenePair1111	7273	79677	TTN	SMC6	0.0007	0.498847	No
GenePair1112	7292	10124	TNFSF4	ARL4A	0.0007	0.511852	No
GenePair1113	7752	10084	ZNF200	PQBP1	0.0007	0.468064	No
GenePair1114	79663	4938	HSPBAP1	OAS1	0.0007	0.496469	No
GenePair1115	79663	79053	HSPBAP1	ALG8	0.0007	0.479521	No
GenePair1116	79730	26010	NSUN7	SPATS2L	0.0007	0.501311	No
GenePair1117	80228	3959	ORAI2	LGALS3BP	0.0007	0.475124	No
GenePair1118	83700	1017	JAM3	CDK2	0.0007	0.605191	No
GenePair1119	83700	124936	JAM3	CYB5D2	0.0007	0.45826	No
GenePair1120	83999	60489	KREMEN1	APOBEC3G	0.0007	0.548217	No
GenePair1121	84795	10124	PYROXD2	ARL4A	0.0007	0.521241	No
GenePair1122	84795	11260	PYROXD2	XPOT	0.0007	0.538179	No
GenePair1123	84795	440957	PYROXD2	SMIM4	0.0007	0.519169	No
GenePair1124	84925	3965	DIRC2	LGALS9	0.0007	0.545568	No
GenePair1125	8612	79035	PLPP2	NABP2	0.0007	0.567575	No
GenePair1126	8843	27258	HCAR3	LSM3	0.0007	0.473576	No
GenePair1127	8843	5082	HCAR3	PDCL	0.0007	0.471838	No
GenePair1128	8848	54460	TSC22D1	MRPS21	0.0007	0.475957	No
GenePair1129	9489	54739	PGS1	XAF1	0.0007	0.526714	No
GenePair1130	9704	54165	DHX34	DCUN1D1	0.0007	0.514336	No
GenePair1131	9778	10392	KIAA0232	NOD1	0.0007	0.572346	No
GenePair1132	9934	10523	P2RY14	CHERP	0.0007	0.48542	No
GenePair1133	9934	78995	P2RY14	C17orf53	0.0007	0.492311	No
GenePair1134	9934	790	P2RY14	CAD	0.0007	0.534258	No
GenePair1135	1071	116028	CETP	RMI2	0.0006	0.549705	No
GenePair1136	10908	286530	PNPLA6	P2RY8	0.0006	0.522897	No
GenePair1137	1232	55723	CCR3	ASF1B	0.0006	0.478192	No
GenePair1138	146225	10561	CMTM2	IFI44	0.0006	0.492231	No
GenePair1139	163351	133957	GBP6	CCDC127	0.0006	0.468708	No
GenePair1140	22884	6730	WDR37	SRP68	0.0006	0.540813	No
GenePair1141	23438	593	HARS2	BCKDHA	0.0006	0.476104	No
GenePair1142	23531	5701	MMD	PSMC2	0.0006	0.491909	No
GenePair1143	25907	84324	TMEM158	SARNP	0.0006	0.481897	No
GenePair1144	26873	23338	OPLAH	JADE2	0.0006	0.465672	No
GenePair1145	26873	387338	OPLAH	NSUN4	0.0006	0.455675	No
GenePair1146	284129	3959	SLC26A11	LGALS3BP	0.0006	0.511819	No
GenePair1147	29035	10964	C16orf72	IFI44L	0.0006	0.494357	No
GenePair1148	29035	64761	C16orf72	PARP12	0.0006	0.512714	No
GenePair1149	3087	3429	HHEX	IFI27	0.0006	0.603009	No
GenePair1150	3104	3191	ZBTB48	HNRNPL	0.0006	0.583459	No
GenePair1151	3104	56943	ZBTB48	ENY2	0.0006	0.499039	No
GenePair1152	3553	54985	IL1B	HCFC1R1	0.0006	0.481423	No
GenePair1153	3556	23386	IL1RAP	NUDCD3	0.0006	0.557699	No
GenePair1154	3632	79035	INPP5A	NABP2	0.0006	0.565863	No
GenePair1155	50862	79132	RNF141	DHX58	0.0006	0.493082	No
GenePair1156	51062	7841	ATL1	MOGS	0.0006	0.456004	No
GenePair1157	51706	4501	CYB5R1	MT1X	0.0006	0.503321	No
GenePair1158	5341	3015	PLEK	H2AFZ	0.0006	0.48316	No
GenePair1159	5423	593	POLB	BCKDHA	0.0006	0.438532	No
GenePair1160	55002	51172	TMCO3	NAGPA	0.0006	0.525802	No
GenePair1161	56034	57510	PDGFC	XPO5	0.0006	0.511379	No
GenePair1162	56996	2537	SLC12A9	IFI6	0.0006	0.512267	No
GenePair1163	57136	3182	APMAP	HNRNPAB	0.0006	0.538725	No
GenePair1164	57136	4502	APMAP	MT2A	0.0006	0.505563	No
GenePair1165	57136	8175	APMAP	SF3A2	0.0006	0.49665	No
GenePair1166	5724	23636	PTAFR	NUP62	0.0006	0.55066	No
GenePair1167	57532	57461	NUFIP2	ISY1	0.0006	0.460667	No
GenePair1168	58497	29087	PRUNE1	THYN1	0.0006	0.478478	No
GenePair1169	5874	84233	RAB27B	TMEM126A	0.0006	0.500818	No
GenePair1170	5874	9552	RAB27B	SPAG7	0.0006	0.497107	No
GenePair1171	60675	2023	PROK2	ENO1	0.0006	0.474515	No
GenePair1172	6249	54948	CLIP1	MRPL16	0.0006	0.504556	No
GenePair1173	6732	55920	SRPK1	RCC2	0.0006	0.516451	No
GenePair1174	7048	3015	TGFBR2	H2AFZ	0.0006	0.492852	No
GenePair1175	7273	26608	TTN	TBL2	0.0006	0.508443	No
GenePair1176	7273	283848	TTN	CES4A	0.0006	0.524075	No
GenePair1177	7292	1857	TNFSF4	DVL3	0.0006	0.484338	No
GenePair1178	777	4939	CACNA1E	OAS2	0.0006	0.576045	No
GenePair1179	79663	6520	HSPBAP1	SLC3A2	0.0006	0.491573	No
GenePair1180	79887	4599	PLBD1	MX1	0.0006	0.472306	No
GenePair1181	83700	5025	JAM3	P2RX4	0.0006	0.561505	No
GenePair1182	83700	8576	JAM3	STK16	0.0006	0.520556	No
GenePair1183	83853	5096	ROPN1L	PCCB	0.0006	0.523675	No
GenePair1184	83999	2618	KREMEN1	GART	0.0006	0.547079	No
GenePair1185	83999	55615	KREMEN1	PRR5	0.0006	0.540712	No
GenePair1186	84255	79050	SLC37A3	NOC4L	0.0006	0.57063	No
GenePair1187	84795	6164	PYROXD2	RPL34	0.0006	0.457434	No
GenePair1188	84795	8310	PYROXD2	ACOX3	0.0006	0.468593	No
GenePair1189	84925	2618	DIRC2	GART	0.0006	0.517956	No
GenePair1190	8530	3669	CST7	ISG20	0.0006	0.468619	No
GenePair1191	8843	83986	HCAR3	FAM234A	0.0006	0.473103	No
GenePair1192	8848	1108	TSC22D1	CHD4	0.0006	0.450358	No
GenePair1193	8968	9332	HIST1H3F	CD163	0.0006	0.468537	No
GenePair1194	9061	6240	PAPSS1	RRM1	0.0006	0.506786	No
GenePair1195	9094	5096	UNC119	PCCB	0.0006	0.540934	No
GenePair1196	9170	539	LPAR2	ATP5PO	0.0006	0.497243	No
GenePair1197	9519	9857	TBPL1	CEP350	0.0006	0.479781	No
GenePair1198	9588	7317	PRDX6	UBA1	0.0006	0.459802	No
GenePair1199	9766	950	SUSD6	SCARB2	0.0006	0.575763	No
GenePair1200	10079	3728	ATP9A	JUP	0.0005	0.489796	No
GenePair1201	10079	4493	ATP9A	MT1E	0.0005	0.46922	No
GenePair1202	101	396	ADAM8	ARHGDIA	0.0005	0.574232	No
GenePair1203	101	7317	ADAM8	UBA1	0.0005	0.563776	No
GenePair1204	10126	5279	DNAL4	PIGC	0.0005	0.557983	No
GenePair1205	10135	94240	NAMPT	EPSTI1	0.0005	0.503854	No
GenePair1206	10205	117246	MPZL2	FTSJ3	0.0005	0.451113	No
GenePair1207	10205	9055	MPZL2	PRC1	0.0005	0.479353	No
GenePair1208	10284	7515	SAP18	XRCC1	0.0005	0.482721	No
GenePair1209	10313	5610	RTN3	EIF2AK2	0.0005	0.492564	No
GenePair1210	11275	10384	KLHL2	BTN3A3	0.0005	0.514455	No
GenePair1211	123041	285148	SLC24A4	IAH1	0.0005	0.487375	No
GenePair1212	1232	23392	CCR3	ECPAS	0.0005	0.481639	No
GenePair1213	136	129607	ADORA2B	CMPK2	0.0005	0.466425	No
GenePair1214	140803	152926	TRPM6	PPM1K	0.0005	0.565438	No
GenePair1215	1602	920	DACH1	CD4	0.0005	0.512109	No
GenePair1216	1602	9910	DACH1	RABGAP1L	0.0005	0.513085	No
GenePair1217	163351	131076	GBP6	CCDC58	0.0005	0.471483	No
GenePair1218	171558	9797	PTCRA	TATDN2	0.0005	0.49266	No
GenePair1219	171586	9552	ABHD3	SPAG7	0.0005	0.482496	No
GenePair1220	220042	55601	DDIAS	DDX60	0.0005	0.523643	No
GenePair1221	23299	55920	BICD2	RCC2	0.0005	0.493956	No
GenePair1222	23416	4939	KCNH3	OAS2	0.0005	0.473859	No
GenePair1223	23483	55723	TGDS	ASF1B	0.0005	0.491656	No
GenePair1224	2791	1345	GNG11	COX6C	0.0005	0.490832	No
GenePair1225	284129	57097	SLC26A11	PARP11	0.0005	0.488704	No
GenePair1226	2908	4939	NR3C1	OAS2	0.0005	0.497557	No
GenePair1227	29767	29015	TMOD2	SLC43A3	0.0005	0.480338	No
GenePair1228	2982	9670	GUCY1A1	IPO13	0.0005	0.469279	No
GenePair1229	2992	55748	GYG1	CNDP2	0.0005	0.496942	No
GenePair1230	3067	2022	HDC	ENG	0.0005	0.4677	No
GenePair1231	3081	23093	HGD	TTLL5	0.0005	0.477312	No
GenePair1232	3087	27338	HHEX	UBE2S	0.0005	0.574579	No
GenePair1233	3315	476	HSPB1	ATP1A1	0.0005	0.44318	No
GenePair1234	3423	54985	IDS	HCFC1R1	0.0005	0.510703	No
GenePair1235	3423	81892	IDS	SLIRP	0.0005	0.479512	No
GenePair1236	3772	2821	KCNJ15	GPI	0.0005	0.505496	No
GenePair1237	5142	81892	PDE4B	SLIRP	0.0005	0.457797	No
GenePair1238	5165	4691	PDK3	NCL	0.0005	0.557858	No
GenePair1239	51706	10007	CYB5R1	GNPDA1	0.0005	0.528774	No
GenePair1240	528	51493	ATP6V1C1	RTCB	0.0005	0.533695	No
GenePair1241	5423	1108	POLB	CHD4	0.0005	0.448883	No
GenePair1242	55884	9332	WSB2	CD163	0.0005	0.480976	No
GenePair1243	5594	2130	MAPK1	EWSR1	0.0005	0.556537	No
GenePair1244	56034	139285	PDGFC	AMER1	0.0005	0.543297	No
GenePair1245	56034	1643	PDGFC	DDB2	0.0005	0.491817	No
GenePair1246	56034	55219	PDGFC	MACO1	0.0005	0.603402	No
GenePair1247	56996	1870	SLC12A9	E2F2	0.0005	0.631649	No
GenePair1248	5724	28958	PTAFR	COA3	0.0005	0.531635	No
GenePair1249	57532	23019	NUFIP2	CNOT1	0.0005	0.476989	No
GenePair1250	57700	522	FAM160B1	ATP5PF	0.0005	0.518847	No
GenePair1251	57700	7384	FAM160B1	UQCRC1	0.0005	0.518047	No
GenePair1252	5836	10589	PYGL	DRAP1	0.0005	0.500301	No
GenePair1253	58500	5439	ZNF250	POLR2J	0.0005	0.504925	No
GenePair1254	6249	10561	CLIP1	IFI44	0.0005	0.485309	No
GenePair1255	64127	9343	NOD2	EFTUD2	0.0005	0.478191	No
GenePair1256	654	10124	BMP6	ARL4A	0.0005	0.478497	No
GenePair1257	7039	4437	TGFA	MSH3	0.0005	0.543607	No
GenePair1258	7059	79132	THBS3	DHX58	0.0005	0.475205	No
GenePair1259	7273	29015	TTN	SLC43A3	0.0005	0.505534	No
GenePair1260	7273	727	TTN	C5	0.0005	0.480273	No
GenePair1261	7273	8659	TTN	ALDH4A1	0.0005	0.471707	No
GenePair1262	7273	9967	TTN	THRAP3	0.0005	0.502778	No
GenePair1263	729359	87178	PLIN4	PNPT1	0.0005	0.521444	No
GenePair1264	7538	537	ZFP36	ATP6AP1	0.0005	0.502047	No
GenePair1265	7739	2067	ZNF185	ERCC1	0.0005	0.549839	No
GenePair1266	7739	8869	ZNF185	ST3GAL5	0.0005	0.487409	No
GenePair1267	79663	113829	HSPBAP1	SLC35A4	0.0005	0.522044	No
GenePair1268	80310	6164	PDGFD	RPL34	0.0005	0.47705	No
GenePair1269	8277	4864	TKTL1	NPC1	0.0005	0.470326	No
GenePair1270	83700	164	JAM3	AP1G1	0.0005	0.527684	No
GenePair1271	83700	51121	JAM3	RPL26L1	0.0005	0.521236	No
GenePair1272	83853	55163	ROPN1L	PNPO	0.0005	0.506711	No
GenePair1273	83989	9797	FAM172A	TATDN2	0.0005	0.543591	No
GenePair1274	83999	26284	KREMEN1	ERAL1	0.0005	0.547488	No
GenePair1275	83999	4938	KREMEN1	OAS1	0.0005	0.550534	No
GenePair1276	84255	139285	SLC37A3	AMER1	0.0005	0.598948	No
GenePair1277	84255	29015	SLC37A3	SLC43A3	0.0005	0.596658	No
GenePair1278	84255	4495	SLC37A3	MT1G	0.0005	0.538068	No
GenePair1279	8477	4724	GPR65	NDUFS4	0.0005	0.542139	No
GenePair1280	8650	55748	NUMB	CNDP2	0.0005	0.535894	No
GenePair1281	8843	124936	HCAR3	CYB5D2	0.0005	0.446211	No
GenePair1282	8843	23179	HCAR3	RGL1	0.0005	0.491673	No
GenePair1283	9061	10561	PAPSS1	IFI44	0.0005	0.477398	No
GenePair1284	9519	113802	TBPL1	HENMT1	0.0005	0.458294	No
GenePair1285	9647	5610	PPM1F	EIF2AK2	0.0005	0.501949	No
GenePair1286	9704	4967	DHX34	OGDH	0.0005	0.486632	No
GenePair1287	9934	51319	P2RY14	RSRC1	0.0005	0.569096	No
GenePair1288	9934	5890	P2RY14	RAD51B	0.0005	0.471799	No
GenePair1289	9934	8659	P2RY14	ALDH4A1	0.0005	0.480843	No
GenePair1290	10087	5184	COL4A3BP	PEPD	0.0004	0.503445	No
GenePair1291	10672	1345	GNA13	COX6C	0.0004	0.503437	No
GenePair1292	1071	30812	CETP	SOX8	0.0004	0.589548	No
GenePair1293	1071	79102	CETP	RNF26	0.0004	0.570387	No
GenePair1294	1071	79711	CETP	IPO4	0.0004	0.570243	No
GenePair1295	11275	130589	KLHL2	GALM	0.0004	0.558149	No
GenePair1296	117289	5279	TAGAP	PIGC	0.0004	0.517561	No
GenePair1297	117289	64764	TAGAP	CREB3L2	0.0004	0.491942	No
GenePair1298	123041	4967	SLC24A4	OGDH	0.0004	0.493545	No
GenePair1299	123041	54165	SLC24A4	DCUN1D1	0.0004	0.569285	No
GenePair1300	1232	5025	CCR3	P2RX4	0.0004	0.489522	No
GenePair1301	132160	1615	PPM1M	DARS	0.0004	0.520718	No
GenePair1302	146223	9381	CMTM4	OTOF	0.0004	0.508669	No
GenePair1303	1602	1017	DACH1	CDK2	0.0004	0.542811	No
GenePair1304	1602	22845	DACH1	DOLK	0.0004	0.471377	No
GenePair1305	203100	7841	HTRA4	MOGS	0.0004	0.479079	No
GenePair1306	2150	54617	F2RL1	INO80	0.0004	0.547951	No
GenePair1307	220213	113829	OTUD1	SLC35A4	0.0004	0.577448	No
GenePair1308	2273	9055	FHL1	PRC1	0.0004	0.532037	No
GenePair1309	23012	29015	STK38L	SLC43A3	0.0004	0.565474	No
GenePair1310	23097	204	CDK19	AK2	0.0004	0.521173	No
GenePair1311	23097	3587	CDK19	IL10RA	0.0004	0.543487	No
GenePair1312	23392	4724	ECPAS	NDUFS4	0.0004	0.468797	No
GenePair1313	23416	29078	KCNH3	NDUFAF4	0.0004	0.502538	No
GenePair1314	23531	6150	MMD	MRPL23	0.0004	0.481378	No
GenePair1315	25805	9031	BAMBI	BAZ1B	0.0004	0.518144	No
GenePair1316	26873	79132	OPLAH	DHX58	0.0004	0.46282	No
GenePair1317	284129	2146	SLC26A11	EZH2	0.0004	0.479526	No
GenePair1318	29035	55163	C16orf72	PNPO	0.0004	0.50035	No
GenePair1319	29767	79228	TMOD2	THOC6	0.0004	0.472752	No
GenePair1320	29887	81892	SNX10	SLIRP	0.0004	0.487133	No
GenePair1321	3087	113802	HHEX	HENMT1	0.0004	0.505652	No
GenePair1322	3556	4493	IL1RAP	MT1E	0.0004	0.548307	No
GenePair1323	359845	51069	RFLNB	MRPL2	0.0004	0.483817	No
GenePair1324	3614	5610	IMPDH1	EIF2AK2	0.0004	0.509995	No
GenePair1325	3772	5708	KCNJ15	PSMD2	0.0004	0.528007	No
GenePair1326	3772	81892	KCNJ15	SLIRP	0.0004	0.496614	No
GenePair1327	3985	51284	LIMK2	TLR7	0.0004	0.541723	No
GenePair1328	400073	6182	C12orf76	MRPL12	0.0004	0.49367	No
GenePair1329	5062	286530	PAK2	P2RY8	0.0004	0.524572	No
GenePair1330	51380	10493	CSAD	VAT1	0.0004	0.475076	No
GenePair1331	51380	4938	CSAD	OAS1	0.0004	0.543475	No
GenePair1332	528	3728	ATP6V1C1	JUP	0.0004	0.526075	No
GenePair1333	5423	51023	POLB	MRPS18C	0.0004	0.472462	No
GenePair1334	55002	10189	TMCO3	ALYREF	0.0004	0.52751	No
GenePair1335	56034	26090	PDGFC	ABHD12	0.0004	0.531333	No
GenePair1336	57136	23636	APMAP	NUP62	0.0004	0.522627	No
GenePair1337	57136	3128	APMAP	HLA-DRB6	0.0004	0.488236	No
GenePair1338	5724	8175	PTAFR	SF3A2	0.0004	0.514563	No
GenePair1339	57532	126328	NUFIP2	NDUFA11	0.0004	0.457073	No
GenePair1340	57532	7384	NUFIP2	UQCRC1	0.0004	0.504915	No
GenePair1341	57533	6240	TBC1D14	RRM1	0.0004	0.570122	No
GenePair1342	57561	10927	ARRDC3	SPIN1	0.0004	0.470943	No
GenePair1343	57561	653479	ARRDC3	MRPL45P2	0.0004	0.48272	No
GenePair1344	58500	51668	ZNF250	HSPB11	0.0004	0.519724	No
GenePair1345	58500	8310	ZNF250	ACOX3	0.0004	0.478549	No
GenePair1346	5874	51651	RAB27B	PTRH2	0.0004	0.512921	No
GenePair1347	59285	7443	CACNG6	VRK1	0.0004	0.500399	No
GenePair1348	60675	6170	PROK2	RPL39	0.0004	0.503757	No
GenePair1349	64332	55748	NFKBIZ	CNDP2	0.0004	0.522507	No
GenePair1350	6500	54460	SKP1	MRPS21	0.0004	0.495335	No
GenePair1351	6652	8799	SORD	PEX11B	0.0004	0.514066	No
GenePair1352	7039	25906	TGFA	ANAPC15	0.0004	0.497988	No
GenePair1353	7273	10112	TTN	KIF20A	0.0004	0.525888	No
GenePair1354	7273	2022	TTN	ENG	0.0004	0.521897	No
GenePair1355	7273	5890	TTN	RAD51B	0.0004	0.473471	No
GenePair1356	7292	2975	TNFSF4	GTF3C1	0.0004	0.548994	No
GenePair1357	7292	8226	TNFSF4	PUDP	0.0004	0.494236	No
GenePair1358	729359	4939	PLIN4	OAS2	0.0004	0.527744	No
GenePair1359	7378	3429	UPP1	IFI27	0.0004	0.539328	No
GenePair1360	7752	6520	ZNF200	SLC3A2	0.0004	0.602505	No
GenePair1361	79007	56919	DBNDD1	DHX33	0.0004	0.49906	No
GenePair1362	79153	955	GDPD3	ENTPD6	0.0004	0.561315	No
GenePair1363	7940	221472	LST1	FGD2	0.0004	0.509547	No
GenePair1364	79663	4724	HSPBAP1	NDUFS4	0.0004	0.66489	No
GenePair1365	83700	115353	JAM3	LRRC42	0.0004	0.530323	No
GenePair1366	83700	2171	JAM3	FABP5	0.0004	0.551291	No
GenePair1367	83700	889	JAM3	KRIT1	0.0004	0.557962	No
GenePair1368	83853	60489	ROPN1L	APOBEC3G	0.0004	0.502889	No
GenePair1369	83999	114049	KREMEN1	BUD23	0.0004	0.531314	No
GenePair1370	83999	55601	KREMEN1	DDX60	0.0004	0.524126	No
GenePair1371	84071	2187	ARMC2	FANCB	0.0004	0.527604	No
GenePair1372	84255	87178	SLC37A3	PNPT1	0.0004	0.526544	No
GenePair1373	8436	219402	CAVIN2	MTIF3	0.0004	0.47242	No
GenePair1374	8436	51372	CAVIN2	TMA7	0.0004	0.495499	No
GenePair1375	84649	79035	DGAT2	NABP2	0.0004	0.58116	No
GenePair1376	84669	8454	USP32	CUL1	0.0004	0.521236	No
GenePair1377	84795	4437	PYROXD2	MSH3	0.0004	0.474484	No
GenePair1378	84795	902	PYROXD2	CCNH	0.0004	0.4855	No
GenePair1379	84895	54867	MIGA2	TMEM214	0.0004	0.495034	No
GenePair1380	84925	91543	DIRC2	RSAD2	0.0004	0.481275	No
GenePair1381	8675	1870	STX16	E2F2	0.0004	0.488612	No
GenePair1382	8843	11156	HCAR3	PTP4A3	0.0004	0.447387	No
GenePair1383	8843	171023	HCAR3	ASXL1	0.0004	0.497293	No
GenePair1384	8843	56919	HCAR3	DHX33	0.0004	0.506492	No
GenePair1385	8848	3005	TSC22D1	H1F0	0.0004	0.569452	No
GenePair1386	8870	1211	IER3	CLTA	0.0004	0.518695	No
GenePair1387	8972	23077	MGAM	MYCBP2	0.0004	0.539351	No
GenePair1388	9019	152926	MPZL1	PPM1K	0.0004	0.519687	No
GenePair1389	9061	100287932	PAPSS1	TIMM23	0.0004	0.538204	No
GenePair1390	91662	5610	NLRP12	EIF2AK2	0.0004	0.541634	No
GenePair1391	9170	1622	LPAR2	DBI	0.0004	0.508075	No
GenePair1392	9218	4939	VAPA	OAS2	0.0004	0.50324	No
GenePair1393	9218	9381	VAPA	OTOF	0.0004	0.499426	No
GenePair1394	9520	1211	NPEPPS	CLTA	0.0004	0.511324	No
GenePair1395	9605	10921	VPS9D1	RNPS1	0.0004	0.515947	No
GenePair1396	9647	3429	PPM1F	IFI27	0.0004	0.552411	No
GenePair1397	9704	55761	DHX34	TTC17	0.0004	0.535631	No
GenePair1398	9704	821	DHX34	CANX	0.0004	0.487615	No
GenePair1399	9778	23386	KIAA0232	NUDCD3	0.0004	0.547792	No
GenePair1400	9778	3959	KIAA0232	LGALS3BP	0.0004	0.54177	No
GenePair1401	9934	23179	P2RY14	RGL1	0.0004	0.517092	No
GenePair1402	100505576	9381	LINC00672	OTOF	0.0003	0.483327	No
GenePair1403	101	5695	ADAM8	PSMB7	0.0003	0.515036	No
GenePair1404	10135	2023	NAMPT	ENO1	0.0003	0.598197	No
GenePair1405	10205	5935	MPZL2	RBM3	0.0003	0.43151	No
GenePair1406	10284	171023	SAP18	ASXL1	0.0003	0.493633	No
GenePair1407	10284	56919	SAP18	DHX33	0.0003	0.472125	No
GenePair1408	10284	889	SAP18	KRIT1	0.0003	0.494821	No
GenePair1409	1071	2146	CETP	EZH2	0.0003	0.536967	No
GenePair1410	10857	6921	PGRMC1	ELOC	0.0003	0.46557	No
GenePair1411	117289	1108	TAGAP	CHD4	0.0003	0.460114	No
GenePair1412	117289	3005	TAGAP	H1F0	0.0003	0.536712	No
GenePair1413	1178	5315	CLC	PKM	0.0003	0.474495	No
GenePair1414	120425	9377	JAML	COX5A	0.0003	0.514288	No
GenePair1415	122402	4939	TDRD9	OAS2	0.0003	0.488295	No
GenePair1416	123041	9332	SLC24A4	CD163	0.0003	0.460221	No
GenePair1417	1232	164	CCR3	AP1G1	0.0003	0.446703	No
GenePair1418	1232	4864	CCR3	NPC1	0.0003	0.426191	No
GenePair1419	1232	51121	CCR3	RPL26L1	0.0003	0.480911	No
GenePair1420	1232	51651	CCR3	PTRH2	0.0003	0.472888	No
GenePair1421	1232	9552	CCR3	SPAG7	0.0003	0.502626	No
GenePair1422	131583	84233	FAM43A	TMEM126A	0.0003	0.491116	No
GenePair1423	134147	51098	CMBL	IFT52	0.0003	0.475697	No
GenePair1424	137835	521	TMEM71	ATP5ME	0.0003	0.539857	No
GenePair1425	146223	23034	CMTM4	SAMD4A	0.0003	0.484155	No
GenePair1426	146223	4495	CMTM4	MT1G	0.0003	0.497209	No
GenePair1427	146225	55748	CMTM2	CNDP2	0.0003	0.507226	No
GenePair1428	146225	684	CMTM2	BST2	0.0003	0.52285	No
GenePair1429	146225	9698	CMTM2	PUM1	0.0003	0.550824	No
GenePair1430	1602	124402	DACH1	UBALD1	0.0003	0.554346	No
GenePair1431	163351	790	GBP6	CAD	0.0003	0.484006	No
GenePair1432	169200	26608	TMEM64	TBL2	0.0003	0.520898	No
GenePair1433	1847	54165	DUSP5	DCUN1D1	0.0003	0.424236	No
GenePair1434	2150	4437	F2RL1	MSH3	0.0003	0.487629	No
GenePair1435	220213	9688	OTUD1	NUP93	0.0003	0.547165	No
GenePair1436	2242	51056	FES	LAP3	0.0003	0.538769	No
GenePair1437	2273	2519	FHL1	FUCA2	0.0003	0.565357	No
GenePair1438	22884	4938	WDR37	OAS1	0.0003	0.486203	No
GenePair1439	22884	7965	WDR37	AIMP2	0.0003	0.536912	No
GenePair1440	23287	474344	AGTPBP1	GIMAP6	0.0003	0.491248	No
GenePair1441	23299	64761	BICD2	PARP12	0.0003	0.491629	No
GenePair1442	23483	2519	TGDS	FUCA2	0.0003	0.472895	No
GenePair1443	23483	55011	TGDS	PIH1D1	0.0003	0.47924	No
GenePair1444	23531	51079	MMD	NDUFA13	0.0003	0.458891	No
GenePair1445	24146	4724	CLDN15	NDUFS4	0.0003	0.500998	No
GenePair1446	249	5720	ALPL	PSME1	0.0003	0.515583	No
GenePair1447	25805	4437	BAMBI	MSH3	0.0003	0.4788	No
GenePair1448	26502	2547	NARF	XRCC6	0.0003	0.542251	No
GenePair1449	266747	1870	RGL4	E2F2	0.0003	0.560003	No
GenePair1450	27018	10007	BEX3	GNPDA1	0.0003	0.471727	No
GenePair1451	2791	54985	GNG11	HCFC1R1	0.0003	0.458078	No
GenePair1452	2791	7384	GNG11	UQCRC1	0.0003	0.521838	No
GenePair1453	29767	488	TMOD2	ATP2A2	0.0003	0.443576	No
GenePair1454	29767	55219	TMOD2	MACO1	0.0003	0.457139	No
GenePair1455	2982	9031	GUCY1A1	BAZ1B	0.0003	0.474795	No
GenePair1456	30061	2537	SLC40A1	IFI6	0.0003	0.521281	No
GenePair1457	3067	23179	HDC	RGL1	0.0003	0.482863	No
GenePair1458	3087	51056	HHEX	LAP3	0.0003	0.526772	No
GenePair1459	3087	54985	HHEX	HCFC1R1	0.0003	0.572896	No
GenePair1460	3423	51329	IDS	ARL6IP4	0.0003	0.521141	No
GenePair1461	3556	2193	IL1RAP	FARSA	0.0003	0.549113	No
GenePair1462	3556	55144	IL1RAP	LRRC8D	0.0003	0.564204	No
GenePair1463	359845	51493	RFLNB	RTCB	0.0003	0.487791	No
GenePair1464	359845	9797	RFLNB	TATDN2	0.0003	0.489331	No
GenePair1465	3632	14	INPP5A	AAMP	0.0003	0.540205	No
GenePair1466	3985	55149	LIMK2	MTPAP	0.0003	0.533268	No
GenePair1467	400073	51651	C12orf76	PTRH2	0.0003	0.453303	No
GenePair1468	402483	91543	LINC01000	RSAD2	0.0003	0.503594	No
GenePair1469	415116	8454	PIM3	CUL1	0.0003	0.506191	No
GenePair1470	4638	494514	MYLK	TYMSOS	0.0003	0.466671	No
GenePair1471	4638	9212	MYLK	AURKB	0.0003	0.498852	No
GenePair1472	4835	4501	NQO2	MT1X	0.0003	0.511391	No
GenePair1473	5055	57510	SERPINB2	XPO5	0.0003	0.546946	No
GenePair1474	50862	26010	RNF141	SPATS2L	0.0003	0.477176	No
GenePair1475	5142	55257	PDE4B	MRGBP	0.0003	0.465012	No
GenePair1476	51439	23392	FAM8A1	ECPAS	0.0003	0.447645	No
GenePair1477	5154	51002	PDGFA	TPRKB	0.0003	0.494496	No
GenePair1478	5154	6522	PDGFA	SLC4A2	0.0003	0.474666	No
GenePair1479	5165	10561	PDK3	IFI44	0.0003	0.509709	No
GenePair1480	5165	64761	PDK3	PARP12	0.0003	0.470799	No
GenePair1481	51706	4704	CYB5R1	NDUFA9	0.0003	0.510449	No
GenePair1482	5256	474344	PHKA2	GIMAP6	0.0003	0.505322	No
GenePair1483	528	51284	ATP6V1C1	TLR7	0.0003	0.513483	No
GenePair1484	5355	10921	PLP2	RNPS1	0.0003	0.468886	No
GenePair1485	54602	152100	NDFIP2	CMC1	0.0003	0.536923	No
GenePair1486	54602	80789	NDFIP2	INTS5	0.0003	0.498628	No
GenePair1487	55002	79080	TMCO3	CCDC86	0.0003	0.50996	No
GenePair1488	55096	3587	EBLN2	IL10RA	0.0003	0.548801	No
GenePair1489	56034	55833	PDGFC	UBAP2	0.0003	0.518409	No
GenePair1490	56034	5884	PDGFC	RAD17	0.0003	0.482256	No
GenePair1491	56978	1025	PRDM8	CDK9	0.0003	0.489704	No
GenePair1492	56996	4502	SLC12A9	MT2A	0.0003	0.511614	No
GenePair1493	56996	51056	SLC12A9	LAP3	0.0003	0.502025	No
GenePair1494	57136	2547	APMAP	XRCC6	0.0003	0.556842	No
GenePair1495	57136	9636	APMAP	ISG15	0.0003	0.491937	No
GenePair1496	5724	10964	PTAFR	IFI44L	0.0003	0.50406	No
GenePair1497	57532	2617	NUFIP2	GARS	0.0003	0.511784	No
GenePair1498	57532	3420	NUFIP2	IDH3B	0.0003	0.489105	No
GenePair1499	57533	5184	TBC1D14	PEPD	0.0003	0.549528	No
GenePair1500	57561	80789	ARRDC3	INTS5	0.0003	0.479038	No
GenePair1501	57700	5315	FAM160B1	PKM	0.0003	0.469561	No
GenePair1502	58191	2130	CXCL16	EWSR1	0.0003	0.552887	No
GenePair1503	5836	4061	PYGL	LY6E	0.0003	0.515439	No
GenePair1504	58497	54165	PRUNE1	DCUN1D1	0.0003	0.475492	No
GenePair1505	58497	6182	PRUNE1	MRPL12	0.0003	0.525764	No
GenePair1506	58497	79602	PRUNE1	ADIPOR2	0.0003	0.462742	No
GenePair1507	5874	84987	RAB27B	COX14	0.0003	0.488508	No
GenePair1508	6253	9381	RTN2	OTOF	0.0003	0.534809	No
GenePair1509	6392	10007	SDHD	GNPDA1	0.0003	0.491322	No
GenePair1510	654	2975	BMP6	GTF3C1	0.0003	0.448907	No
GenePair1511	654	50	BMP6	ACO2	0.0003	0.462404	No
GenePair1512	6732	5394	SRPK1	EXOSC10	0.0003	0.541501	No
GenePair1513	677	1345	ZFP36L1	COX6C	0.0003	0.51177	No
GenePair1514	7059	22845	THBS3	DOLK	0.0003	0.516821	No
GenePair1515	7059	54617	THBS3	INO80	0.0003	0.552557	No
GenePair1516	7059	8914	THBS3	TIMELESS	0.0003	0.501994	No
GenePair1517	7059	9910	THBS3	RABGAP1L	0.0003	0.535668	No
GenePair1518	7273	10380	TTN	BPNT1	0.0003	0.508738	No
GenePair1519	7273	11326	TTN	VSIG4	0.0003	0.4482	No
GenePair1520	7273	133383	TTN	SETD9	0.0003	0.494595	No
GenePair1521	7273	2140	TTN	EYA3	0.0003	0.478632	No
GenePair1522	7273	23500	TTN	DAAM2	0.0003	0.441462	No
GenePair1523	7273	643866	TTN	CBLN3	0.0003	0.471281	No
GenePair1524	7273	7292	TTN	TNFSF4	0.0003	0.451446	No
GenePair1525	7273	90417	TTN	KNSTRN	0.0003	0.500268	No
GenePair1526	79007	83986	DBNDD1	FAM234A	0.0003	0.478836	No
GenePair1527	79663	130589	HSPBAP1	GALM	0.0003	0.485921	No
GenePair1528	79792	5695	GSDMD	PSMB7	0.0003	0.447261	No
GenePair1529	79792	7384	GSDMD	UQCRC1	0.0003	0.439624	No
GenePair1530	80325	4061	ABTB1	LY6E	0.0003	0.56885	No
GenePair1531	80726	2171	IQCN	FABP5	0.0003	0.478567	No
GenePair1532	81544	10124	GDPD5	ARL4A	0.0003	0.473439	No
GenePair1533	83700	55011	JAM3	PIH1D1	0.0003	0.600956	No
GenePair1534	83700	55421	JAM3	NCBP3	0.0003	0.543708	No
GenePair1535	83853	10921	ROPN1L	RNPS1	0.0003	0.498487	No
GenePair1536	83862	4502	TMEM120A	MT2A	0.0003	0.530136	No
GenePair1537	83862	55920	TMEM120A	RCC2	0.0003	0.515802	No
GenePair1538	83999	113829	KREMEN1	SLC35A4	0.0003	0.541889	No
GenePair1539	83999	1635	KREMEN1	DCTD	0.0003	0.55256	No
GenePair1540	83999	3005	KREMEN1	H1F0	0.0003	0.65071	No
GenePair1541	83999	5096	KREMEN1	PCCB	0.0003	0.557097	No
GenePair1542	83999	8869	KREMEN1	ST3GAL5	0.0003	0.507154	No
GenePair1543	83999	9790	KREMEN1	BMS1	0.0003	0.546423	No
GenePair1544	84071	131076	ARMC2	CCDC58	0.0003	0.488808	No
GenePair1545	84255	7517	SLC37A3	XRCC3	0.0003	0.559589	No
GenePair1546	8440	7384	NCK2	UQCRC1	0.0003	0.482195	No
GenePair1547	8459	3429	TPST2	IFI27	0.0003	0.541268	No
GenePair1548	8459	55748	TPST2	CNDP2	0.0003	0.51033	No
GenePair1549	84795	29015	PYROXD2	SLC43A3	0.0003	0.540685	No
GenePair1550	84795	3382	PYROXD2	ICA1	0.0003	0.504199	No
GenePair1551	84795	56954	PYROXD2	NIT2	0.0003	0.505516	No
GenePair1552	84795	7083	PYROXD2	TK1	0.0003	0.56355	No
GenePair1553	84795	80789	PYROXD2	INTS5	0.0003	0.527896	No
GenePair1554	84895	55723	MIGA2	ASF1B	0.0003	0.464819	No
GenePair1555	84925	3735	DIRC2	KARS	0.0003	0.530308	No
GenePair1556	8522	10561	GAS7	IFI44	0.0003	0.479737	No
GenePair1557	8654	5025	PDE5A	P2RX4	0.0003	0.570296	No
GenePair1558	8843	2519	HCAR3	FUCA2	0.0003	0.480533	No
GenePair1559	8843	9031	HCAR3	BAZ1B	0.0003	0.449958	No
GenePair1560	8848	593	TSC22D1	BCKDHA	0.0003	0.448833	No
GenePair1561	8848	81892	TSC22D1	SLIRP	0.0003	0.469758	No
GenePair1562	8972	2618	MGAM	GART	0.0003	0.516741	No
GenePair1563	8972	9790	MGAM	BMS1	0.0003	0.519029	No
GenePair1564	9061	28958	PAPSS1	COA3	0.0003	0.551159	No
GenePair1565	9094	2618	UNC119	GART	0.0003	0.534393	No
GenePair1566	9094	4938	UNC119	OAS1	0.0003	0.486178	No
GenePair1567	9094	51075	UNC119	TMX2	0.0003	0.563876	No
GenePair1568	9094	57062	UNC119	DDX24	0.0003	0.574025	No
GenePair1569	9170	5695	LPAR2	PSMB7	0.0003	0.543275	No
GenePair1570	9218	22845	VAPA	DOLK	0.0003	0.558165	No
GenePair1571	9647	4061	PPM1F	LY6E	0.0003	0.57887	No
GenePair1572	9704	79602	DHX34	ADIPOR2	0.0003	0.487463	No
GenePair1573	9778	79714	KIAA0232	CCDC51	0.0003	0.55889	No
GenePair1574	9934	2954	P2RY14	GSTZ1	0.0003	0.537676	No
GenePair1575	9934	79754	P2RY14	ASB13	0.0003	0.487056	No
GenePair1576	10079	23338	ATP9A	JADE2	0.0002	0.472253	No
GenePair1577	10079	60489	ATP9A	APOBEC3G	0.0002	0.502186	No
GenePair1578	10079	64928	ATP9A	MRPL14	0.0002	0.477509	No
GenePair1579	10079	8869	ATP9A	ST3GAL5	0.0002	0.477213	No
GenePair1580	10079	9688	ATP9A	NUP93	0.0002	0.485609	No
GenePair1581	10087	10561	COL4A3BP	IFI44	0.0002	0.479568	No
GenePair1582	10087	4938	COL4A3BP	OAS1	0.0002	0.452805	No
GenePair1583	10126	593	DNAL4	BCKDHA	0.0002	0.51639	No
GenePair1584	10205	115353	MPZL2	LRRC42	0.0002	0.440473	No
GenePair1585	10205	23179	MPZL2	RGL1	0.0002	0.487583	No
GenePair1586	10205	440957	MPZL2	SMIM4	0.0002	0.474563	No
GenePair1587	10205	56919	MPZL2	DHX33	0.0002	0.460866	No
GenePair1588	10284	8269	SAP18	TMEM187	0.0002	0.464822	No
GenePair1589	10434	1025	LYPLA1	CDK9	0.0002	0.51741	No
GenePair1590	10434	4967	LYPLA1	OGDH	0.0002	0.529576	No
GenePair1591	10540	1870	DCTN2	E2F2	0.0002	0.487698	No
GenePair1592	10672	539	GNA13	ATP5PO	0.0002	0.48206	No
GenePair1593	1071	9862	CETP	MED24	0.0002	0.565337	No
GenePair1594	10857	5701	PGRMC1	PSMC2	0.0002	0.516287	No
GenePair1595	10857	6150	PGRMC1	MRPL23	0.0002	0.501777	No
GenePair1596	10908	64761	PNPLA6	PARP12	0.0002	0.492457	No
GenePair1597	10908	8175	PNPLA6	SF3A2	0.0002	0.484281	No
GenePair1598	10924	4493	SMPDL3A	MT1E	0.0002	0.534429	No
GenePair1599	11126	10124	CD160	ARL4A	0.0002	0.441669	No
GenePair1600	11275	26010	KLHL2	SPATS2L	0.0002	0.464926	No
GenePair1601	11275	3418	KLHL2	IDH2	0.0002	0.55064	No
GenePair1602	11275	55601	KLHL2	DDX60	0.0002	0.492742	No
GenePair1603	11275	64928	KLHL2	MRPL14	0.0002	0.542556	No
GenePair1604	116496	3669	FAM129A	ISG20	0.0002	0.501708	No
GenePair1605	117289	55257	TAGAP	MRGBP	0.0002	0.455418	No
GenePair1606	132160	8405	PPM1M	SPOP	0.0002	0.476772	No
GenePair1607	132720	4864	FAM241A	NPC1	0.0002	0.513559	No
GenePair1608	133	4599	ADM	MX1	0.0002	0.563791	No
GenePair1609	134957	7347	STXBP5	UCHL3	0.0002	0.513431	No
GenePair1610	1362	23077	CPD	MYCBP2	0.0002	0.547191	No
GenePair1611	146225	51307	CMTM2	FAM53C	0.0002	0.465987	No
GenePair1612	157697	10007	ERICH1	GNPDA1	0.0002	0.540378	No
GenePair1613	1602	1662	DACH1	DDX10	0.0002	0.504884	No
GenePair1614	1602	79714	DACH1	CCDC51	0.0002	0.496446	No
GenePair1615	165140	9381	OXER1	OTOF	0.0002	0.514681	No
GenePair1616	169200	6522	TMEM64	SLC4A2	0.0002	0.45963	No
GenePair1617	171586	55761	ABHD3	TTC17	0.0002	0.502047	No
GenePair1618	1824	4939	DSC2	OAS2	0.0002	0.565598	No
GenePair1619	1824	9381	DSC2	OTOF	0.0002	0.52263	No
GenePair1620	1845	539	DUSP3	ATP5PO	0.0002	0.49246	No
GenePair1621	205564	5510	SENP5	PPP1R7	0.0002	0.442915	No
GenePair1622	2117	26608	ETV3	TBL2	0.0002	0.50185	No
GenePair1623	2150	1349	F2RL1	COX7B	0.0002	0.548735	No
GenePair1624	2150	27258	F2RL1	LSM3	0.0002	0.503867	No
GenePair1625	2150	7798	F2RL1	LUZP1	0.0002	0.573948	No
GenePair1626	2162	4967	F13A1	OGDH	0.0002	0.491063	No
GenePair1627	2162	5708	F13A1	PSMD2	0.0002	0.507021	No
GenePair1628	220042	124997	DDIAS	WDR81	0.0002	0.527215	No
GenePair1629	220042	162394	DDIAS	SLFN5	0.0002	0.51605	No
GenePair1630	220042	54617	DDIAS	INO80	0.0002	0.522887	No
GenePair1631	220042	79443	DDIAS	FYCO1	0.0002	0.517492	No
GenePair1632	220042	8607	DDIAS	RUVBL1	0.0002	0.484132	No
GenePair1633	2273	116832	FHL1	RPL39L	0.0002	0.550492	No
GenePair1634	22884	3587	WDR37	IL10RA	0.0002	0.514745	No
GenePair1635	22928	10921	SEPHS2	RNPS1	0.0002	0.544303	No
GenePair1636	23012	55219	STK38L	MACO1	0.0002	0.562571	No
GenePair1637	23200	3728	ATP11B	JUP	0.0002	0.574272	No
GenePair1638	23258	7317	DENND5A	UBA1	0.0002	0.499021	No
GenePair1639	23287	3587	AGTPBP1	IL10RA	0.0002	0.500226	No
GenePair1640	23287	5184	AGTPBP1	PEPD	0.0002	0.533584	No
GenePair1641	23416	9862	KCNH3	MED24	0.0002	0.522924	No
GenePair1642	23483	9670	TGDS	IPO13	0.0002	0.502492	No
GenePair1643	23531	2079	MMD	ERH	0.0002	0.46674	No
GenePair1644	23531	6464	MMD	SHC1	0.0002	0.456237	No
GenePair1645	23531	6921	MMD	ELOC	0.0002	0.469682	No
GenePair1646	24146	4240	CLDN15	MFGE8	0.0002	0.571468	No
GenePair1647	25805	116832	BAMBI	RPL39L	0.0002	0.488483	No
GenePair1648	25805	50	BAMBI	ACO2	0.0002	0.504992	No
GenePair1649	25805	55723	BAMBI	ASF1B	0.0002	0.499326	No
GenePair1650	25805	5935	BAMBI	RBM3	0.0002	0.488	No
GenePair1651	25907	4724	TMEM158	NDUFS4	0.0002	0.491652	No
GenePair1652	25907	821	TMEM158	CANX	0.0002	0.45078	No
GenePair1653	26502	10964	NARF	IFI44L	0.0002	0.479536	No
GenePair1654	26502	27338	NARF	UBE2S	0.0002	0.500807	No
GenePair1655	26873	1352	OPLAH	COX10	0.0002	0.480552	No
GenePair1656	27018	126328	BEX3	NDUFA11	0.0002	0.496984	No
GenePair1657	272	23034	AMPD3	SAMD4A	0.0002	0.510073	No
GenePair1658	272	4495	AMPD3	MT1G	0.0002	0.506188	No
GenePair1659	285362	4682	SUMF1	NUBP1	0.0002	0.491562	No
GenePair1660	285362	55149	SUMF1	MTPAP	0.0002	0.467949	No
GenePair1661	285362	6741	SUMF1	SSB	0.0002	0.490803	No
GenePair1662	29035	286530	C16orf72	P2RY8	0.0002	0.519536	No
GenePair1663	29035	4502	C16orf72	MT2A	0.0002	0.512712	No
GenePair1664	29767	116832	TMOD2	RPL39L	0.0002	0.449179	No
GenePair1665	29767	152100	TMOD2	CMC1	0.0002	0.516054	No
GenePair1666	29767	23179	TMOD2	RGL1	0.0002	0.510176	No
GenePair1667	29767	55776	TMOD2	SAYSD1	0.0002	0.503694	No
GenePair1668	29767	9967	TMOD2	THRAP3	0.0002	0.410838	No
GenePair1669	2982	54867	GUCY1A1	TMEM214	0.0002	0.491936	No
GenePair1670	3067	29015	HDC	SLC43A3	0.0002	0.474672	No
GenePair1671	3087	10921	HHEX	RNPS1	0.0002	0.540951	No
GenePair1672	3087	55163	HHEX	PNPO	0.0002	0.520962	No
GenePair1673	3087	7384	HHEX	UQCRC1	0.0002	0.495559	No
GenePair1674	3104	55257	ZBTB48	MRGBP	0.0002	0.507176	No
GenePair1675	3104	55337	ZBTB48	C19orf66	0.0002	0.493642	No
GenePair1676	3556	10915	IL1RAP	TCERG1	0.0002	0.548039	No
GenePair1677	3556	28989	IL1RAP	NTMT1	0.0002	0.555647	No
GenePair1678	3556	79714	IL1RAP	CCDC51	0.0002	0.560466	No
GenePair1679	359845	3418	RFLNB	IDH2	0.0002	0.49771	No
GenePair1680	359845	6741	RFLNB	SSB	0.0002	0.495834	No
GenePair1681	3613	9636	IMPA2	ISG15	0.0002	0.492857	No
GenePair1682	3632	387338	INPP5A	NSUN4	0.0002	0.512662	No
GenePair1683	3632	7347	INPP5A	UCHL3	0.0002	0.544426	No
GenePair1684	3693	1025	ITGB5	CDK9	0.0002	0.458167	No
GenePair1685	3693	3191	ITGB5	HNRNPL	0.0002	0.562795	No
GenePair1686	3693	8824	ITGB5	CES2	0.0002	0.486957	No
GenePair1687	3985	26010	LIMK2	SPATS2L	0.0002	0.544456	No
GenePair1688	402483	204	LINC01000	AK2	0.0002	0.519826	No
GenePair1689	4043	55337	LRPAP1	C19orf66	0.0002	0.490393	No
GenePair1690	4084	3015	MXD1	H2AFZ	0.0002	0.499622	No
GenePair1691	415116	23165	PIM3	NUP205	0.0002	0.52698	No
GenePair1692	415116	91543	PIM3	RSAD2	0.0002	0.488566	No
GenePair1693	50862	54617	RNF141	INO80	0.0002	0.544048	No
GenePair1694	50862	79035	RNF141	NABP2	0.0002	0.49996	No
GenePair1695	51108	256281	METTL9	NUDT14	0.0002	0.539792	No
GenePair1696	51108	3728	METTL9	JUP	0.0002	0.534114	No
GenePair1697	51380	26130	CSAD	GAPVD1	0.0002	0.519268	No
GenePair1698	51380	84106	CSAD	PRAM1	0.0002	0.452902	No
GenePair1699	5142	593	PDE4B	BCKDHA	0.0002	0.498535	No
GenePair1700	51439	84324	FAM8A1	SARNP	0.0002	0.499978	No
GenePair1701	5154	79630	PDGFA	C1orf54	0.0002	0.457422	No
GenePair1702	5165	3429	PDK3	IFI27	0.0002	0.599828	No
GenePair1703	5256	5905	PHKA2	RANGAP1	0.0002	0.499339	No
GenePair1704	5256	64761	PHKA2	PARP12	0.0002	0.498742	No
GenePair1705	528	4493	ATP6V1C1	MT1E	0.0002	0.512018	No
GenePair1706	54602	2975	NDFIP2	GTF3C1	0.0002	0.517638	No
GenePair1707	54602	5082	NDFIP2	PDCL	0.0002	0.450544	No
GenePair1708	54602	51668	NDFIP2	HSPB11	0.0002	0.472528	No
GenePair1709	54602	55011	NDFIP2	PIH1D1	0.0002	0.509078	No
GenePair1710	54602	5935	NDFIP2	RBM3	0.0002	0.439104	No
GenePair1711	54602	84320	NDFIP2	ACBD6	0.0002	0.450985	No
GenePair1712	54849	1870	DEF8	E2F2	0.0002	0.585694	No
GenePair1713	55	4939	ACPP	OAS2	0.0002	0.476847	No
GenePair1714	55002	55689	TMCO3	YEATS2	0.0002	0.554921	No
GenePair1715	55002	79035	TMCO3	NABP2	0.0002	0.467057	No
GenePair1716	55096	10561	EBLN2	IFI44	0.0002	0.494684	No
GenePair1717	55276	10384	PGM2	BTN3A3	0.0002	0.483445	No
GenePair1718	55277	955	FGGY	ENTPD6	0.0002	0.508092	No
GenePair1719	55884	10084	WSB2	PQBP1	0.0002	0.552342	No
GenePair1720	55884	3728	WSB2	JUP	0.0002	0.561388	No
GenePair1721	55884	4493	WSB2	MT1E	0.0002	0.580705	No
GenePair1722	55902	64761	ACSS2	PARP12	0.0002	0.481935	No
GenePair1723	55909	54165	BIN3	DCUN1D1	0.0002	0.479317	No
GenePair1724	56034	7517	PDGFC	XRCC3	0.0002	0.509705	No
GenePair1725	56034	7678	PDGFC	ZNF124	0.0002	0.559779	No
GenePair1726	56911	9797	MAP3K7CL	TATDN2	0.0002	0.469114	No
GenePair1727	56996	3429	SLC12A9	IFI27	0.0002	0.528068	No
GenePair1728	57136	286530	APMAP	P2RY8	0.0002	0.515765	No
GenePair1729	57136	3429	APMAP	IFI27	0.0002	0.538504	No
GenePair1730	57149	1870	LYRM1	E2F2	0.0002	0.51802	No
GenePair1731	57149	522	LYRM1	ATP5PF	0.0002	0.47491	No
GenePair1732	5724	3434	PTAFR	IFIT1	0.0002	0.467267	No
GenePair1733	5747	4240	PTK2	MFGE8	0.0002	0.500069	No
GenePair1734	57532	64979	NUFIP2	MRPL36	0.0002	0.511726	No
GenePair1735	57533	64761	TBC1D14	PARP12	0.0002	0.516334	No
GenePair1736	57561	2975	ARRDC3	GTF3C1	0.0002	0.445851	No
GenePair1737	57561	6173	ARRDC3	RPL36A	0.0002	0.446665	No
GenePair1738	57561	64777	ARRDC3	RMND5B	0.0002	0.478335	No
GenePair1739	57700	539	FAM160B1	ATP5PO	0.0002	0.491088	No
GenePair1740	5836	6773	PYGL	STAT2	0.0002	0.53008	No
GenePair1741	58497	2475	PRUNE1	MTOR	0.0002	0.474664	No
GenePair1742	58497	27258	PRUNE1	LSM3	0.0002	0.452912	No
GenePair1743	58497	51606	PRUNE1	ATP6V1H	0.0002	0.477565	No
GenePair1744	58500	116832	ZNF250	RPL39L	0.0002	0.543057	No
GenePair1745	58500	4123	ZNF250	MAN2C1	0.0002	0.58015	No
GenePair1746	58500	79102	ZNF250	RNF26	0.0002	0.543545	No
GenePair1747	58500	81790	ZNF250	RNF170	0.0002	0.551061	No
GenePair1748	58500	9443	ZNF250	MED7	0.0002	0.514895	No
GenePair1749	58500	9980	ZNF250	DOPEY2	0.0002	0.469007	No
GenePair1750	5874	23367	RAB27B	LARP1	0.0002	0.486502	No
GenePair1751	5874	4864	RAB27B	NPC1	0.0002	0.445981	No
GenePair1752	5874	8269	RAB27B	TMEM187	0.0002	0.482382	No
GenePair1753	59285	29890	CACNG6	RBM15B	0.0002	0.501919	No
GenePair1754	604	2597	BCL6	GAPDH	0.0002	0.517565	No
GenePair1755	6249	5905	CLIP1	RANGAP1	0.0002	0.477155	No
GenePair1756	64127	5708	NOD2	PSMD2	0.0002	0.447035	No
GenePair1757	64326	3128	COP1	HLA-DRB6	0.0002	0.493535	No
GenePair1758	64332	3429	NFKBIZ	IFI27	0.0002	0.554419	No
GenePair1759	64397	10921	ZNF106	RNPS1	0.0002	0.528588	No
GenePair1760	654	116832	BMP6	RPL39L	0.0002	0.444497	No
GenePair1761	654	26608	BMP6	TBL2	0.0002	0.450212	No
GenePair1762	654	4437	BMP6	MSH3	0.0002	0.446276	No
GenePair1763	654	7083	BMP6	TK1	0.0002	0.545711	No
GenePair1764	6583	23019	SLC22A4	CNOT1	0.0002	0.578351	No
GenePair1765	6648	4061	SOD2	LY6E	0.0002	0.484646	No
GenePair1766	6732	1211	SRPK1	CLTA	0.0002	0.554167	No
GenePair1767	6732	51056	SRPK1	LAP3	0.0002	0.460268	No
GenePair1768	6732	950	SRPK1	SCARB2	0.0002	0.574905	No
GenePair1769	7039	9552	TGFA	SPAG7	0.0002	0.466226	No
GenePair1770	7048	537	TGFBR2	ATP6AP1	0.0002	0.441869	No
GenePair1771	7048	6923	TGFBR2	ELOB	0.0002	0.454909	No
GenePair1772	7059	1017	THBS3	CDK2	0.0002	0.574631	No
GenePair1773	7059	3959	THBS3	LGALS3BP	0.0002	0.456547	No
GenePair1774	7273	203100	TTN	HTRA4	0.0002	0.445055	No
GenePair1775	7273	22875	TTN	ENPP4	0.0002	0.49877	No
GenePair1776	7273	29767	TTN	TMOD2	0.0002	0.424907	No
GenePair1777	7273	3485	TTN	IGFBP2	0.0002	0.450872	No
GenePair1778	7273	394	TTN	ARHGAP5	0.0002	0.490343	No
GenePair1779	7273	55839	TTN	CENPN	0.0002	0.488292	No
GenePair1780	7273	6035	TTN	RNASE1	0.0002	0.432214	No
GenePair1781	7273	79102	TTN	RNF26	0.0002	0.499221	No
GenePair1782	7273	84767	TTN	TRIM51	0.0002	0.456397	No
GenePair1783	7292	116832	TNFSF4	RPL39L	0.0002	0.484778	No
GenePair1784	7292	25902	TNFSF4	MTHFD1L	0.0002	0.516182	No
GenePair1785	7292	84320	TNFSF4	ACBD6	0.0002	0.525946	No
GenePair1786	729359	79050	PLIN4	NOC4L	0.0002	0.592186	No
GenePair1787	7739	3587	ZNF185	IL10RA	0.0002	0.565464	No
GenePair1788	7752	29081	ZNF200	METTL5	0.0002	0.489143	No
GenePair1789	7752	81502	ZNF200	HM13	0.0002	0.473994	No
GenePair1790	777	9381	CACNA1E	OTOF	0.0002	0.560661	No
GenePair1791	79188	396	TMEM43	ARHGDIA	0.0002	0.500779	No
GenePair1792	7940	3429	LST1	IFI27	0.0002	0.576942	No
GenePair1793	7940	5610	LST1	EIF2AK2	0.0002	0.529081	No
GenePair1794	79663	3735	HSPBAP1	KARS	0.0002	0.55167	No
GenePair1795	79663	54939	HSPBAP1	COMMD4	0.0002	0.600603	No
GenePair1796	79792	23019	GSDMD	CNOT1	0.0002	0.461261	No
GenePair1797	79899	51002	PRR5L	TPRKB	0.0002	0.441954	No
GenePair1798	79899	653479	PRR5L	MRPL45P2	0.0002	0.49948	No
GenePair1799	800	494514	CALD1	TYMSOS	0.0002	0.50889	No
GenePair1800	80094	9967	BIN3-IT1	THRAP3	0.0002	0.465692	No
GenePair1801	80228	55144	ORAI2	LRRC8D	0.0002	0.488935	No
GenePair1802	8277	116832	TKTL1	RPL39L	0.0002	0.467644	No
GenePair1803	8334	2734	HIST1H2AC	GLG1	0.0002	0.47125	No
GenePair1804	8360	113263	HIST1H4D	GLCCI1	0.0002	0.486673	No
GenePair1805	837	515	CASP4	ATP5PB	0.0002	0.454992	No
GenePair1806	83700	10956	JAM3	OS9	0.0002	0.474094	No
GenePair1807	83700	1606	JAM3	DGKA	0.0002	0.555866	No
GenePair1808	83700	399909	JAM3	PCNX3	0.0002	0.594177	No
GenePair1809	83700	5082	JAM3	PDCL	0.0002	0.504797	No
GenePair1810	83853	4521	ROPN1L	NUDT1	0.0002	0.493784	No
GenePair1811	83853	7965	ROPN1L	AIMP2	0.0002	0.537902	No
GenePair1812	83989	4682	FAM172A	NUBP1	0.0002	0.514167	No
GenePair1813	83999	51172	KREMEN1	NAGPA	0.0002	0.515719	No
GenePair1814	84071	79411	ARMC2	GLB1L	0.0002	0.493535	No
GenePair1815	8436	10007	CAVIN2	GNPDA1	0.0002	0.546859	No
GenePair1816	8436	404672	CAVIN2	GTF2H5	0.0002	0.506105	No
GenePair1817	8436	51329	CAVIN2	ARL6IP4	0.0002	0.471023	No
GenePair1818	8436	57461	CAVIN2	ISY1	0.0002	0.471808	No
GenePair1819	8436	6119	CAVIN2	RPA3	0.0002	0.580187	No
GenePair1820	84519	10007	ACRBP	GNPDA1	0.0002	0.500113	No
GenePair1821	84669	130589	USP32	GALM	0.0002	0.603274	No
GenePair1822	84669	55149	USP32	MTPAP	0.0002	0.518253	No
GenePair1823	84895	56919	MIGA2	DHX33	0.0002	0.465418	No
GenePair1824	84895	9641	MIGA2	IKBKE	0.0002	0.608059	No
GenePair1825	84925	9790	DIRC2	BMS1	0.0002	0.498292	No
GenePair1826	8555	55219	CDC14B	MACO1	0.0002	0.555055	No
GenePair1827	8569	64761	MKNK1	PARP12	0.0002	0.498907	No
GenePair1828	8650	10589	NUMB	DRAP1	0.0002	0.571383	No
GenePair1829	8654	9332	PDE5A	CD163	0.0002	0.516195	No
GenePair1830	8676	25824	STX11	PRDX5	0.0002	0.503449	No
GenePair1831	8736	117246	MYOM1	FTSJ3	0.0002	0.520733	No
GenePair1832	8843	10956	HCAR3	OS9	0.0002	0.478236	No
GenePair1833	8843	116832	HCAR3	RPL39L	0.0002	0.451265	No
GenePair1834	8843	23586	HCAR3	DDX58	0.0002	0.521988	No
GenePair1835	8843	26523	HCAR3	AGO1	0.0002	0.432916	No
GenePair1836	8843	7347	HCAR3	UCHL3	0.0002	0.459054	No
GenePair1837	8843	8226	HCAR3	PUDP	0.0002	0.484694	No
GenePair1838	8870	204	IER3	AK2	0.0002	0.496005	No
GenePair1839	8870	51056	IER3	LAP3	0.0002	0.513737	No
GenePair1840	8870	8815	IER3	BANF1	0.0002	0.506428	No
GenePair1841	8972	1635	MGAM	DCTD	0.0002	0.532967	No
GenePair1842	8972	5096	MGAM	PCCB	0.0002	0.529766	No
GenePair1843	8972	55615	MGAM	PRR5	0.0002	0.529957	No
GenePair1844	8972	60489	MGAM	APOBEC3G	0.0002	0.494268	No
GenePair1845	9061	4502	PAPSS1	MT2A	0.0002	0.508192	No
GenePair1846	9061	9636	PAPSS1	ISG15	0.0002	0.496591	No
GenePair1847	9094	10007	UNC119	GNPDA1	0.0002	0.594588	No
GenePair1848	9094	10921	UNC119	RNPS1	0.0002	0.550617	No
GenePair1849	91662	4502	NLRP12	MT2A	0.0002	0.497838	No
GenePair1850	9218	79714	VAPA	CCDC51	0.0002	0.59495	No
GenePair1851	9519	2821	TBPL1	GPI	0.0002	0.452476	No
GenePair1852	9520	5096	NPEPPS	PCCB	0.0002	0.502866	No
GenePair1853	9520	57062	NPEPPS	DDX24	0.0002	0.499858	No
GenePair1854	960	5720	CD44	PSME1	0.0002	0.535265	No
GenePair1855	9605	57062	VPS9D1	DDX24	0.0002	0.509769	No
GenePair1856	9647	1615	PPM1F	DARS	0.0002	0.542703	No
GenePair1857	9647	5920	PPM1F	RARRES3	0.0002	0.536297	No
GenePair1858	9658	6355	ZNF516	CCL8	0.0002	0.468122	No
GenePair1859	9770	9377	RASSF2	COX5A	0.0002	0.541229	No
GenePair1860	9934	10112	P2RY14	KIF20A	0.0002	0.477014	No
GenePair1861	9934	11326	P2RY14	VSIG4	0.0002	0.447227	No
GenePair1862	9934	284119	P2RY14	CAVIN1	0.0002	0.418008	No
GenePair1863	9934	285282	P2RY14	RABL3	0.0002	0.543705	No
GenePair1864	9934	3416	P2RY14	IDE	0.0002	0.510867	No
GenePair1865	9934	54914	P2RY14	FOCAD	0.0002	0.539087	No
GenePair1866	9934	64857	P2RY14	PLEKHG2	0.0002	0.47408	No
GenePair1867	9934	79102	P2RY14	RNF26	0.0002	0.487219	No
GenePair1868	9934	81928	P2RY14	CABLES2	0.0002	0.529368	No
GenePair1869	9934	9212	P2RY14	AURKB	0.0002	0.512515	No
GenePair1870	100505576	29993	LINC00672	PACSIN1	0.0001	0.464665	No
GenePair1871	100505576	4939	LINC00672	OAS2	0.0001	0.5625	No
GenePair1872	10079	10007	ATP9A	GNPDA1	0.0001	0.504648	No
GenePair1873	10079	3005	ATP9A	H1F0	0.0001	0.507544	No
GenePair1874	10079	3965	ATP9A	LGALS9	0.0001	0.561661	No
GenePair1875	10079	51069	ATP9A	MRPL2	0.0001	0.492977	No
GenePair1876	10079	6730	ATP9A	SRP68	0.0001	0.549754	No
GenePair1877	10079	79902	ATP9A	NUP85	0.0001	0.505495	No
GenePair1878	10087	10964	COL4A3BP	IFI44L	0.0001	0.47791	No
GenePair1879	10087	3434	COL4A3BP	IFIT1	0.0001	0.467469	No
GenePair1880	10087	474344	COL4A3BP	GIMAP6	0.0001	0.524785	No
GenePair1881	101	1870	ADAM8	E2F2	0.0001	0.580099	No
GenePair1882	101	23019	ADAM8	CNOT1	0.0001	0.575	No
GenePair1883	101	3692	ADAM8	EIF6	0.0001	0.507937	No
GenePair1884	10100	29993	TSPAN2	PACSIN1	0.0001	0.505495	No
GenePair1885	10100	57613	TSPAN2	FAM234B	0.0001	0.47526	No
GenePair1886	10100	6355	TSPAN2	CCL8	0.0001	0.439585	No
GenePair1887	10100	9381	TSPAN2	OTOF	0.0001	0.460318	No
GenePair1888	10126	29093	DNAL4	MRPL22	0.0001	0.478596	No
GenePair1889	10135	4170	NAMPT	MCL1	0.0001	0.588847	No
GenePair1890	10135	7048	NAMPT	TGFBR2	0.0001	0.493347	No
GenePair1891	10135	9636	NAMPT	ISG15	0.0001	0.501595	No
GenePair1892	10205	10956	MPZL2	OS9	0.0001	0.437793	No
GenePair1893	10205	124402	MPZL2	UBALD1	0.0001	0.525593	No
GenePair1894	10205	3382	MPZL2	ICA1	0.0001	0.44639	No
GenePair1895	10205	5082	MPZL2	PDCL	0.0001	0.475251	No
GenePair1896	10217	3382	CTDSPL	ICA1	0.0001	0.478448	No
GenePair1897	10217	54867	CTDSPL	TMEM214	0.0001	0.54251	No
GenePair1898	10217	55011	CTDSPL	PIH1D1	0.0001	0.581807	No
GenePair1899	10284	1606	SAP18	DGKA	0.0001	0.493439	No
GenePair1900	10284	54867	SAP18	TMEM214	0.0001	0.471415	No
GenePair1901	10284	7347	SAP18	UCHL3	0.0001	0.515873	No
GenePair1902	10284	9552	SAP18	SPAG7	0.0001	0.449016	No
GenePair1903	10285	29093	SMNDC1	MRPL22	0.0001	0.549754	No
GenePair1904	10434	285367	LYPLA1	RPUSD3	0.0001	0.584249	No
GenePair1905	10434	56943	LYPLA1	ENY2	0.0001	0.537316	No
GenePair1906	10672	522	GNA13	ATP5PF	0.0001	0.455434	No
GenePair1907	1071	4495	CETP	MT1G	0.0001	0.512709	No
GenePair1908	1071	87178	CETP	PNPT1	0.0001	0.471433	No
GenePair1909	10908	1870	PNPLA6	E2F2	0.0001	0.632543	No
GenePair1910	10908	2130	PNPLA6	EWSR1	0.0001	0.541667	No
GenePair1911	10908	3429	PNPLA6	IFI27	0.0001	0.566704	No
GenePair1912	10938	4061	EHD1	LY6E	0.0001	0.523168	No
GenePair1913	1124	10124	CHN2	ARL4A	0.0001	0.465008	No
GenePair1914	11275	2067	KLHL2	ERCC1	0.0001	0.609589	No
GenePair1915	11275	387338	KLHL2	NSUN4	0.0001	0.475	No
GenePair1916	11275	4938	KLHL2	OAS1	0.0001	0.532357	No
GenePair1917	11275	51264	KLHL2	MRPL27	0.0001	0.592186	No
GenePair1918	11275	51654	KLHL2	CDK5RAP1	0.0001	0.523924	No
GenePair1919	11275	55337	KLHL2	C19orf66	0.0001	0.570208	No
GenePair1920	11275	84916	KLHL2	UTP4	0.0001	0.52351	No
GenePair1921	116173	10084	CMTM5	PQBP1	0.0001	0.527091	No
GenePair1922	116173	4864	CMTM5	NPC1	0.0001	0.481681	No
GenePair1923	116173	55723	CMTM5	ASF1B	0.0001	0.506561	No
GenePair1924	117289	285148	TAGAP	IAH1	0.0001	0.408333	No
GenePair1925	117289	5684	TAGAP	PSMA3	0.0001	0.489255	No
GenePair1926	117289	80349	TAGAP	WDR61	0.0001	0.490908	No
GenePair1927	1178	23019	CLC	CNOT1	0.0001	0.491667	No
GenePair1928	1178	25824	CLC	PRDX5	0.0001	0.478359	No
GenePair1929	1178	539	CLC	ATP5PO	0.0001	0.633334	No
GenePair1930	1198	2617	CLK3	GARS	0.0001	0.483951	No
GenePair1931	120425	3015	JAML	H2AFZ	0.0001	0.603175	No
GenePair1932	120425	94240	JAML	EPSTI1	0.0001	0.481471	No
GenePair1933	122402	26010	TDRD9	SPATS2L	0.0001	0.491662	No
GenePair1934	123041	140465	SLC24A4	MYL6B	0.0001	0.484365	No
GenePair1935	123041	4125	SLC24A4	MAN2B1	0.0001	0.477238	No
GenePair1936	123041	56943	SLC24A4	ENY2	0.0001	0.465555	No
GenePair1937	123041	56997	SLC24A4	COQ8A	0.0001	0.458741	No
GenePair1938	123041	57466	SLC24A4	SCAF4	0.0001	0.533625	No
GenePair1939	123041	821	SLC24A4	CANX	0.0001	0.470749	No
GenePair1940	123041	9797	SLC24A4	TATDN2	0.0001	0.528708	No
GenePair1941	1232	1025	CCR3	CDK9	0.0001	0.484127	No
GenePair1942	1232	1349	CCR3	COX7B	0.0001	0.485238	No
GenePair1943	1232	23586	CCR3	DDX58	0.0001	0.472522	No
GenePair1944	1232	54867	CCR3	TMEM214	0.0001	0.479257	No
GenePair1945	1232	55011	CCR3	PIH1D1	0.0001	0.488382	No
GenePair1946	1232	5510	CCR3	PPP1R7	0.0001	0.500138	No
GenePair1947	1232	6037	CCR3	RNASE3	0.0001	0.462822	No
GenePair1948	1232	7347	CCR3	UCHL3	0.0001	0.515036	No
GenePair1949	1232	7515	CCR3	XRCC1	0.0001	0.458334	No
GenePair1950	1232	9797	CCR3	TATDN2	0.0001	0.506716	No
GenePair1951	131583	2475	FAM43A	MTOR	0.0001	0.451371	No
GenePair1952	131583	27258	FAM43A	LSM3	0.0001	0.434806	No
GenePair1953	131583	29081	FAM43A	METTL5	0.0001	0.461476	No
GenePair1954	132720	55723	FAM241A	ASF1B	0.0001	0.523168	No
GenePair1955	132720	56919	FAM241A	DHX33	0.0001	0.481957	No
GenePair1956	133	3015	ADM	H2AFZ	0.0001	0.495626	No
GenePair1957	136	3959	ADORA2B	LGALS3BP	0.0001	0.601563	No
GenePair1958	1362	5096	CPD	PCCB	0.0001	0.5398	No
GenePair1959	137835	25824	TMEM71	PRDX5	0.0001	0.467558	No
GenePair1960	140460	3959	ASB7	LGALS3BP	0.0001	0.566587	No
GenePair1961	140803	26010	TRPM6	SPATS2L	0.0001	0.503008	No
GenePair1962	140885	55303	SIRPA	GIMAP4	0.0001	0.467971	No
GenePair1963	1438	55163	CSF2RA	PNPO	0.0001	0.476191	No
GenePair1964	1441	9168	CSF3R	TMSB10	0.0001	0.47791	No
GenePair1965	146225	10574	CMTM2	CCT7	0.0001	0.568987	No
GenePair1966	146225	114908	CMTM2	TMEM123	0.0001	0.508334	No
GenePair1967	146225	3608	CMTM2	ILF2	0.0001	0.532328	No
GenePair1968	146225	56996	CMTM2	SLC12A9	0.0001	0.447858	No
GenePair1969	148223	117246	C19orf25	FTSJ3	0.0001	0.466667	No
GenePair1970	157697	372	ERICH1	ARCN1	0.0001	0.486468	No
GenePair1971	1602	116028	DACH1	RMI2	0.0001	0.509022	No
GenePair1972	1602	124997	DACH1	WDR81	0.0001	0.510815	No
GenePair1973	1602	152100	DACH1	CMC1	0.0001	0.485959	No
GenePair1974	1602	23386	DACH1	NUDCD3	0.0001	0.488401	No
GenePair1975	1602	29078	DACH1	NDUFAF4	0.0001	0.499461	No
GenePair1976	1602	3959	DACH1	LGALS3BP	0.0001	0.476191	No
GenePair1977	1602	54842	DACH1	MFSD6	0.0001	0.535611	No
GenePair1978	1602	79080	DACH1	CCDC86	0.0001	0.512302	No
GenePair1979	163351	27175	GBP6	TUBG2	0.0001	0.539601	No
GenePair1980	165140	4495	OXER1	MT1G	0.0001	0.529304	No
GenePair1981	165140	57510	OXER1	XPO5	0.0001	0.547704	No
GenePair1982	165140	8914	OXER1	TIMELESS	0.0001	0.484127	No
GenePair1983	169200	29015	TMEM64	SLC43A3	0.0001	0.523213	No
GenePair1984	171586	1025	ABHD3	CDK9	0.0001	0.492674	No
GenePair1985	1824	4495	DSC2	MT1G	0.0001	0.528428	No
GenePair1986	199675	3669	MCEMP1	ISG20	0.0001	0.482778	No
GenePair1987	2117	29015	ETV3	SLC43A3	0.0001	0.492892	No
GenePair1988	2150	10956	F2RL1	OS9	0.0001	0.546606	No
GenePair1989	2150	164	F2RL1	AP1G1	0.0001	0.467033	No
GenePair1990	2150	2171	F2RL1	FABP5	0.0001	0.535409	No
GenePair1991	2150	26523	F2RL1	AGO1	0.0001	0.492209	No
GenePair1992	2150	3382	F2RL1	ICA1	0.0001	0.481472	No
GenePair1993	2150	387893	F2RL1	KMT5A	0.0001	0.5	No
GenePair1994	2150	54165	F2RL1	DCUN1D1	0.0001	0.46556	No
GenePair1995	2150	56919	F2RL1	DHX33	0.0001	0.539683	No
GenePair1996	2150	889	F2RL1	KRIT1	0.0001	0.600565	No
GenePair1997	2150	9055	F2RL1	PRC1	0.0001	0.489622	No
GenePair1998	2162	3191	F13A1	HNRNPL	0.0001	0.530892	No
[truncated: 524 more rows]
